# Supplementary material for: Disruption of entire Cables2 locus leads to embryonic lethality by diminished Rps21 gene expression and enhanced p53 pathway
Source: eLife. 2021 May 5;10:e50346. doi: 10.7554/eLife.50346 (PMC8099427; doi:10.7554/eLife.50346)
Supplement: Supplementary file 1. — Statistical significance was determined using ANOVA test (FDR < 0.05). This gene list is related to heatmap in Figure 6A. [file elife-50346-supp1.xlsx]

## Sheet: Sheet1
Feature ID	Experiment - Range (normalized values)	Experiment - IQR (normalized values)	Experiment - Difference (normalized values)	Experiment - Fold Change (normalized values)	ANOVA normalized values - Max difference	ANOVA normalized values - Max fold change	ANOVA normalized values - Test statistic	ANOVA normalized values - P-value	ANOVA normalized values - FDR p-value correction
Cyct	29.33	20.33	-23.31	-16.54	-23.31	-16.54	30.09	0.000104	0.02
Irs4	199.17	155.17	-172.5	-12.11	-172.5	-12.11	58.11	8.96e-06	0.007
Rpl10l	30.33	17.58	-23.06	-9.56	-23.06	-9.56	29.62	0.000111	0.02
Sycp3	58.75	38.83	-50.08	-8.64	-50.08	-8.64	26.75	0.00016	0.03
Sfrp5	66.08	48.67	-47.83	-8.12	-47.83	-8.12	30.08	0.000105	0.02
Gpc4	238.08	169.08	-209.5	-6.02	-209.5	-6.02	29.06	0.000119	0.02
Relt	28.17	8	-20.92	-5.38	-20.92	-5.38	19.42	0.000497	0.04
Twist1	41.58	31.67	-37.86	-4.95	-37.86	-4.95	31.19	9.17e-05	0.02
Abca4	35.92	26.17	-27.61	-4.9	-27.61	-4.9	25.54	0.000189	0.03
Cfi	54.75	32.83	-47.94	-4.78	-47.94	-4.78	24.42	0.000222	0.03
Ror1	46.92	28.67	-37.81	-4.02	-37.81	-4.02	29.07	0.000118	0.02
Fermt1	67.67	19.33	-52.53	-3.93	-52.53	-3.93	24.1	0.000233	0.03
Col23a1	91.75	58.83	-66.22	-3.84	-66.22	-3.84	21.69	0.000338	0.04
Cds1	41.5	25.58	-28.53	-3.75	-28.53	-3.75	23.13	0.000269	0.04
Rps21	782.25	552.17	-674.17	-3.69	-674.17	-3.69	52.74	1.29e-05	0.0074
Galnt3	111.92	66.67	-86.64	-3.63	-86.64	-3.63	22.14	0.000314	0.04
Atp8a1	90	59.42	-71.83	-3.54	-71.83	-3.54	44.83	2.39e-05	0.01
Prss12	157.17	88.83	-137.97	-3.51	-137.97	-3.51	23.89	0.00024	0.03
Sntb1	27.67	13.75	-20.97	-3.21	-20.97	-3.21	21.57	0.000344	0.04
Slc25a33	79.25	50.92	-62.78	-3.07	-62.78	-3.07	25.06	0.000202	0.03
Rhox5	1344.58	616.25	-1088.11	-3.05	-1088.11	-3.05	23.4	0.000258	0.03
2410006H16Rik	71.5	50.92	-63.78	-2.95	-63.78	-2.95	21.8	0.000332	0.04
Zfp667	72.5	54.08	-55.56	-2.91	-55.56	-2.91	21.61	0.000342	0.04
Has2	134.58	85.75	-99.72	-2.9	-99.72	-2.9	24.68	0.000214	0.03
Atox1	111.5	56.08	-78.94	-2.51	-78.94	-2.51	22.06	0.000318	0.04
Rpl27a	1502.92	902.42	-1115.78	-2.5	-1115.78	-2.5	20.97	0.00038	0.04
Ctsl	3214.83	1730.67	-2312.75	-2.44	-2312.75	-2.44	19.87	0.000459	0.04
Ap1m2	112.75	34.58	-91.47	-2.29	-91.47	-2.29	49.43	1.65e-05	0.00862
Haus2	75.5	55.5	-67.47	-2.2	-67.47	-2.2	22.32	0.000305	0.04
Rps5	1133.58	673.33	-892.81	-2.18	-892.81	-2.18	19.36	0.000502	0.04
Msmo1	90.17	63.25	-70.11	-2.17	-70.11	-2.17	22.72	0.000287	0.04
Bri3	45.08	27.42	-36.31	-2.13	-36.31	-2.13	43.02	2.79e-05	0.01
Slc7a7	199.17	111.67	-146.39	-2.13	-146.39	-2.13	32.22	8.14e-05	0.02
Atp5g1	101.58	66.17	-70.94	-2.05	-70.94	-2.05	21.03	0.000376	0.04
Slc40a1	97.17	27.42	-73.72	-2.04	-73.72	-2.04	22.92	0.000278	0.04
Hat1	911.17	289.17	-692.97	-2.02	-692.97	-2.02	21.4	0.000354	0.04
Ctsc	299.92	199.67	-231.5	-2.01	-231.5	-2.01	22.34	0.000305	0.04
Tpd52	222.08	95.25	-177.81	-2.01	-177.81	-2.01	51.38	1.43e-05	0.00805
Msl1	134.5	70.92	103.67	2	103.67	2	26.24	0.000172	0.03
Exoc4	220.25	129.5	183.83	2.04	183.83	2.04	31.28	9.07e-05	0.02
Susd6	101.25	72.83	83.11	2.04	83.11	2.04	139.07	3.06e-07	0.000948
Ccar2	94.25	55.67	74.47	2.05	74.47	2.05	23.01	0.000274	0.04
1190002N15Rik	64.25	45.42	49.69	2.06	49.69	2.06	36.86	4.96e-05	0.01
Zfp236	160.08	105.5	117.22	2.08	117.22	2.08	19.99	0.000449	0.04
Greb1	120.67	72.33	102.67	2.09	102.67	2.09	45.34	2.29e-05	0.01
Whsc1	639.83	381.83	478.28	2.09	478.28	2.09	23.82	0.000242	0.03
Tcf3	283.17	177.33	219.69	2.11	219.69	2.11	21.5	0.000348	0.04
Tmem164	105.75	68.58	84.53	2.11	84.53	2.11	57.79	9.15e-06	0.007
Rcn2	92.58	61.67	77.31	2.12	77.31	2.12	29.96	0.000106	0.02
Sulf2	312	234.08	258.33	2.12	258.33	2.12	25.21	0.000198	0.03
Hipk2	135.67	92.67	115.53	2.14	115.53	2.14	22.11	0.000316	0.04
Pkd2	70.67	47.92	53.17	2.14	53.17	2.14	19.76	0.000468	0.04
Lmo7	105.67	70.5	84.19	2.16	84.19	2.16	19.77	0.000467	0.04
Epb41	491.33	277.75	377.64	2.22	377.64	2.22	27.65	0.000142	0.03
Rab8b	113.08	79.25	86.22	2.34	86.22	2.34	37.69	4.57e-05	0.01
Spred1	237.17	137.58	181.5	2.34	181.5	2.34	37.55	4.63e-05	0.01
Epha4	123.08	82.83	105.33	2.36	105.33	2.36	73.88	3.57e-06	0.00443
Rai1	131.67	77.83	100.53	2.39	100.53	2.39	27.09	0.000153	0.03
Dennd2a	93.25	60.83	69.08	2.4	69.08	2.4	20.19	0.000434	0.04
Dusp4	99.83	52.33	73.83	2.4	73.83	2.4	26.29	0.00017	0.03
Greb1l	345.17	205.58	254.14	2.4	254.14	2.4	22.45	0.000299	0.04
Igfbp4	382.75	227.58	290.06	2.42	290.06	2.42	29.36	0.000114	0.02
Glipr2	44.75	25	39.19	2.45	39.19	2.45	20.55	0.000408	0.04
Gpc1	73.83	47.75	59.83	2.46	59.83	2.46	21.6	0.000343	0.04
Sav1	66.58	48.33	57.81	2.46	57.81	2.46	30.84	9.56e-05	0.02
Nin	196.08	124.75	137.53	2.47	137.53	2.47	22.27	0.000308	0.04
Fnbp1	103.58	76.75	87.64	2.48	87.64	2.48	74.3	3.5e-06	0.00443
Tacc1	171.33	131.92	134.75	2.49	134.75	2.49	23.05	0.000272	0.04
Zfp516	150.5	95.5	120.56	2.49	120.56	2.49	29	0.00012	0.02
Bcl9	143.58	89.33	110.78	2.52	110.78	2.52	19.65	0.000477	0.04
Abhd4	46.08	41.5	43.08	2.54	43.08	2.54	25.49	0.00019	0.03
Amotl2	415.17	266.92	307.61	2.54	307.61	2.54	37.22	4.78e-05	0.01
Grsf1	473.83	224	341.36	2.56	341.36	2.56	25.69	0.000185	0.03
Kmt2a	466.5	329.33	347.22	2.56	347.22	2.56	28.76	0.000123	0.03
Utrn	374.17	234.75	271.81	2.56	271.81	2.56	26.47	0.000166	0.03
Lpp	116.42	77.5	97.22	2.61	97.22	2.61	36.48	5.15e-05	0.02
Kif1b	227.33	144.08	180.75	2.62	180.75	2.62	21	0.000379	0.04
Sash1	100.33	56.42	76.39	2.62	76.39	2.62	20.45	0.000415	0.04
Dicer1	413.92	305.67	341.44	2.63	341.44	2.63	33.61	6.97e-05	0.02
Usp29	41.33	27.67	32.83	2.64	32.83	2.64	19.46	0.000493	0.04
Pdzrn3	31.83	20.58	24.5	2.65	24.5	2.65	24.03	0.000235	0.03
St14	214.25	123.42	161.31	2.65	161.31	2.65	22.41	0.000301	0.04
Ccdc136	82.92	62.5	65.89	2.67	65.89	2.67	21.68	0.000339	0.04
Dst	865.5	628.5	722.08	2.7	722.08	2.7	20.62	0.000404	0.04
Map7d1	253.5	127.17	183.42	2.72	183.42	2.72	21.08	0.000373	0.04
Rab11fip1	146.5	124.5	125	2.72	125	2.72	43.76	2.62e-05	0.01
Evc2	95.67	71.5	74.61	2.73	74.61	2.73	29.39	0.000114	0.02
Hip1	281	160.58	202.94	2.73	202.94	2.73	23.02	0.000274	0.04
Arhgap32	82	42.67	63.39	2.74	63.39	2.74	19.34	0.000504	0.04
Gpc6	31.17	16.08	25.78	2.77	25.78	2.77	58.19	8.91e-06	0.007
Igsf3	103.75	64.58	74.33	2.78	74.33	2.78	22.11	0.000315	0.04
Tnrc6b	126.25	90.67	107.44	2.79	107.44	2.79	25.6	0.000187	0.03
Fndc3c1	124.83	90	100.25	2.81	100.25	2.81	25.99	0.000178	0.03
Tead1	389.67	313.25	334.69	2.81	334.69	2.81	49.87	1.6e-05	0.00844
Zcchc11	235.42	174.75	206.67	2.82	206.67	2.82	20.38	0.00042	0.04
Rbms1	205.92	171.42	177.86	2.88	177.86	2.88	52.88	1.28e-05	0.0074
Stxbp4	76.25	39.33	59.25	2.88	59.25	2.88	23.92	0.000239	0.03
Kirrel	90.17	67.83	75.58	2.91	75.58	2.91	108.53	8.06e-07	0.0021
Gan	76.75	66.5	70	2.92	70	2.92	67.46	5.07e-06	0.00558
Slc6a6	237.75	167.5	194.06	2.93	194.06	2.93	44.02	2.56e-05	0.01
Peg3	2635.75	2214	2295.42	2.94	2295.42	2.94	43.3	2.72e-05	0.01
Ralgps2	184.92	123.5	139.67	2.95	139.67	2.95	24.43	0.000222	0.03
Inf2	39.58	23.08	29.56	2.96	29.56	2.96	22.03	0.00032	0.04
Nrp1	73.42	34.75	57.86	2.97	57.86	2.97	22.48	0.000298	0.04
Srcap	274.83	153.67	192.69	2.99	192.69	2.99	20.13	0.000438	0.04
Adgra2	84.75	58.92	72.89	3.06	72.89	3.06	77.54	2.97e-06	0.00403
Sulf1	185.83	144.08	163.97	3.06	163.97	3.06	20.13	0.000439	0.04
Nuak1	41.5	33.33	37.44	3.07	37.44	3.07	105.32	9.06e-07	0.00225
Piezo2	44.83	22.25	34.47	3.08	34.47	3.08	21.26	0.000362	0.04
St3gal2	47.83	25.42	35.53	3.12	35.53	3.12	23.77	0.000244	0.03
Cnn2	102.75	48.5	81.44	3.13	81.44	3.13	25.45	0.000191	0.03
Nf1	175.08	108.17	135	3.14	135	3.14	26.81	0.000159	0.03
Nrp2	232.5	172.92	190.69	3.15	190.69	3.15	48.03	1.84e-05	0.00915
Btg2	61.75	49.67	53.36	3.17	53.36	3.17	28.14	0.000133	0.03
Fgfr2	346.5	218.5	256.5	3.18	256.5	3.18	22.12	0.000315	0.04
Dzip1l	73.42	49.08	55.31	3.23	55.31	3.23	26.8	0.000159	0.03
Exoc6b	97.17	71.75	86.58	3.23	86.58	3.23	48.42	1.79e-05	0.00896
Tnfrsf19	164.25	117.75	130.86	3.27	130.86	3.27	37.33	4.73e-05	0.01
Ptk7	209.42	120.17	152.78	3.3	152.78	3.3	32.25	8.11e-05	0.02
Rasa3	45.92	29.17	35.39	3.31	35.39	3.31	31.28	9.07e-05	0.02
Ece1	170.08	101.67	137.31	3.32	137.31	3.32	49.32	1.67e-05	0.00862
Fgfr1	315.67	187.75	241.25	3.32	241.25	3.32	19.32	0.000506	0.04
Bcorl1	91.83	64.08	76.42	3.35	76.42	3.35	23.67	0.000248	0.03
Itpr1	215	168.42	181.17	3.38	181.17	3.38	37.6	4.61e-05	0.01
Frem2	183.67	118.67	138.33	3.42	138.33	3.42	27.46	0.000146	0.03
Tcf4	102	72.33	84.25	3.42	84.25	3.42	88.75	1.76e-06	0.0032
Stard8	208.75	128.17	173.64	3.45	173.64	3.45	76.75	3.09e-06	0.00403
Pik3c2b	26.67	22.58	23.53	3.46	23.53	3.46	20.48	0.000413	0.04
Klhl13	540.5	323.5	436.89	3.48	436.89	3.48	28.23	0.000132	0.03
Nkd1	138.67	96.17	107.42	3.49	107.42	3.49	41.03	3.33e-05	0.01
Fstl1	218.75	138.42	173.25	3.51	173.25	3.51	28.04	0.000135	0.03
Marcks	288.58	202.92	228.53	3.51	228.53	3.51	23.04	0.000273	0.04
Ahnak	927.42	602.42	703.97	3.53	703.97	3.53	32.77	7.65e-05	0.02
Rgma	57.75	40.33	42.97	3.59	42.97	3.59	31.14	9.22e-05	0.02
Myh10	1449.25	1013	1135.25	3.62	1135.25	3.62	33	7.46e-05	0.02
Phactr2	56.42	40.25	46.97	3.62	46.97	3.62	88.15	1.81e-06	0.0032
Tnfrsf10b	73.83	51	57.83	3.64	57.83	3.64	21.1	0.000372	0.04
Plekho1	46.58	19.33	39.11	3.65	39.11	3.65	35.12	5.93e-05	0.02
Ptch1	348.17	246.17	273.22	3.72	273.22	3.72	54.52	1.14e-05	0.00735
Cbx2	95.5	62.5	79.64	3.74	79.64	3.74	41.32	3.24e-05	0.01
Smtnl2	36.42	27.58	30.06	3.75	30.06	3.75	55.22	1.09e-05	0.00733
Cald1	323.33	201.58	271.58	3.76	271.58	3.76	43.57	2.66e-05	0.01
H2afy2	109.17	61.33	83.44	3.79	83.44	3.79	30.93	9.46e-05	0.02
Amotl1	269.83	152.08	192.11	3.83	192.11	3.83	24.89	0.000207	0.03
Igf1r	233.58	166.25	186.44	3.86	186.44	3.86	27.01	0.000155	0.03
Lats2	81	63.67	70.39	3.86	70.39	3.86	38.61	4.17e-05	0.01
Soga1	153	92.17	116.39	3.86	116.39	3.86	20.92	0.000383	0.04
Peli2	57	40.67	47.78	3.89	47.78	3.89	29.58	0.000111	0.02
Sh3kbp1	50.67	40.67	45.31	3.91	45.31	3.91	32	8.35e-05	0.02
Zdbf2	127.92	78.08	101.86	3.95	101.86	3.95	21.24	0.000364	0.04
Nfatc1	47.58	26	36.81	3.98	36.81	3.98	39.73	3.75e-05	0.01
Axin2	266.33	159	205.5	3.99	205.5	3.99	29.65	0.00011	0.02
Asb4	102.83	75	87.33	4.04	87.33	4.04	63.62	6.34e-06	0.00616
Smad3	116.75	104.83	106.06	4.04	106.06	4.04	21.43	0.000352	0.04
Baz2b	219.33	123.75	158.92	4.05	158.92	4.05	31.76	8.58e-05	0.02
Cask	103.33	80.08	84	4.07	84	4.07	36.26	5.27e-05	0.02
Zswim6	39.08	30.17	34.42	4.11	34.42	4.11	29.14	0.000117	0.02
Aebp1	37.33	27.17	29.67	4.13	29.67	4.13	25.53	0.000189	0.03
Zim1	27.08	18.33	21.56	4.23	21.56	4.23	22.36	0.000303	0.04
Jag1	64.17	50.83	59.92	4.32	59.92	4.32	35.19	5.89e-05	0.02
F2r	195.83	133.75	165.97	4.37	165.97	4.37	50.45	1.53e-05	0.00834
Ppp2r2c	100.42	73.67	79.33	4.41	79.33	4.41	41.98	3.06e-05	0.01
Nefm	192.83	128.58	151.03	4.57	151.03	4.57	38.29	4.3e-05	0.01
Stox2	69.5	42.5	55.61	4.59	55.61	4.59	37.05	4.87e-05	0.01
Limch1	49.33	29.33	38.61	4.62	38.61	4.62	25.19	0.000199	0.03
Ephb2	79.42	51.08	59.11	4.63	59.11	4.63	25.19	0.000199	0.03
Mtss1l	111.33	69.25	87.58	4.65	87.58	4.65	60.55	7.66e-06	0.00677
Arrb1	206	113.83	159.14	4.69	159.14	4.69	22.64	0.00029	0.04
Map1b	456.33	259.67	328.36	4.81	328.36	4.81	20.33	0.000424	0.04
Zfp423	127.42	86.83	97.83	4.88	97.83	4.88	45.8	2.21e-05	0.01
Tmem47	80.08	44.08	69.97	4.91	69.97	4.91	31.91	8.43e-05	0.02
Tcaf1	85.08	49.42	65.36	4.92	65.36	4.92	25.99	0.000177	0.03
Casz1	87.25	62.33	76.72	4.98	76.72	4.98	22.5	0.000297	0.04
Flna	1208.58	918.83	1027.11	5.07	1027.11	5.07	31.59	8.75e-05	0.02
Nexn	28.67	22.67	22.89	5.16	22.89	5.16	23.35	0.00026	0.03
Rhobtb3	129.5	64.33	101.92	5.19	101.92	5.19	24.47	0.00022	0.03
Apcdd1	61.08	46.08	53.31	5.22	53.31	5.22	40.04	3.65e-05	0.01
Hmga2	430.25	347.25	375.08	5.27	375.08	5.27	65.25	5.76e-06	0.00581
Hmha1	53	40.58	44.67	5.33	44.67	5.33	20.66	0.000401	0.04
Pbx1	302.75	199.83	244.56	5.44	244.56	5.44	22.37	0.000303	0.04
Trp53inp1	386.58	297.25	322.22	5.44	322.22	5.44	65.14	5.79e-06	0.00581
Ccng1	717.67	621.75	670.89	5.51	670.89	5.51	148.31	2.38e-07	0.000842
Fn1	2738.17	2447.58	2394.14	5.51	2394.14	5.51	70.86	4.19e-06	0.00487
Nfkb1	84.67	54.17	61.75	5.55	61.75	5.55	19.9	0.000456	0.04
Syne2	260.5	179.75	205.97	5.58	205.97	5.58	27.31	0.000149	0.03
Rnf144a	47.92	32.5	37.83	5.71	37.83	5.71	29.24	0.000116	0.02
Chd7	797.33	462.17	587	5.78	587	5.78	28.23	0.000132	0.03
Gnao1	37	20.83	26.81	5.85	26.81	5.85	26.6	0.000163	0.03
Map1a	76.17	49.25	56.06	5.85	56.06	5.85	29.04	0.000119	0.02
Ror2	68.5	48	58.61	5.85	58.61	5.85	30.45	0.0001	0.02
Kif21b	113.42	82.83	98.78	5.93	98.78	5.93	82.49	2.34e-06	0.00346
Zfp711	42.75	23.75	33.89	5.98	33.89	5.98	27.61	0.000143	0.03
Rspo3	96.92	55.83	77.25	6.12	77.25	6.12	38.22	4.34e-05	0.01
Bmp7	50.58	29.92	39.06	6.15	39.06	6.15	46.19	2.14e-05	0.01
Gpsm1	60.33	41.58	52.61	6.17	52.61	6.17	28.86	0.000122	0.02
Kalrn	99.92	73	89.78	6.21	89.78	6.21	54.31	1.16e-05	0.00737
Runx1t1	27.92	14.58	20.47	6.26	20.47	6.26	22.86	0.000281	0.04
C530008M17Rik	119.58	96	100.89	6.32	100.89	6.32	39.29	3.91e-05	0.01
Notch1	107.25	57	78.67	6.4	78.67	6.4	21.87	0.000328	0.04
Sh3pxd2a	148.83	94.33	128.14	6.4	128.14	6.4	41.19	3.28e-05	0.01
Cables2	64.42	43	52.81	6.48	52.81	6.48	50.76	1.5e-05	0.00824
Hand1	454.92	291.42	380.36	6.49	380.36	6.49	29.27	0.000116	0.02
Fzd10	43.42	34.5	37.25	6.68	37.25	6.68	58.99	8.46e-06	0.007
Nhsl2	76.42	39.92	56.67	6.73	56.67	6.73	26.77	0.00016	0.03
Trp53i11	70.08	56.5	59.56	6.79	59.56	6.79	54.53	1.14e-05	0.00735
Prkd1	50.33	29.42	37.11	6.91	37.11	6.91	27.15	0.000152	0.03
Frmd6	106.33	57.92	80.67	7.02	80.67	7.02	19.98	0.00045	0.04
L1cam	36.25	17.92	24.25	7.15	24.25	7.15	19.62	0.00048	0.04
Fgd5	51.17	37.92	44.28	7.18	44.28	7.18	54.85	1.12e-05	0.00735
Flnc	198.92	145.58	163.17	7.29	163.17	7.29	22.65	0.00029	0.04
Arnt2	32	24.92	28.81	7.36	28.81	7.36	36.32	5.24e-05	0.02
Cttnbp2	27.17	19.42	23.22	7.48	23.22	7.48	96.46	1.27e-06	0.00275
Gli3	197.33	160.08	170.89	7.5	170.89	7.5	57.51	9.32e-06	0.007
Igsf10	25.08	18.75	21.36	7.75	21.36	7.75	59.69	8.09e-06	0.00692
Irs1	63.5	49.5	57.56	7.75	57.56	7.75	44.86	2.38e-05	0.01
Timp2	39.5	28	33.58	7.91	33.58	7.91	32.54	7.85e-05	0.02
Ccdc80	26.17	21.25	22.33	7.93	22.33	7.93	61.12	7.39e-06	0.00677
Prtg	1844.42	1304.92	1576.56	8.06	1576.56	8.06	82.14	2.38e-06	0.00346
Antxr1	44.42	25.67	33.58	8.24	33.58	8.24	39.71	3.76e-05	0.01
Heg1	84.83	58	66.19	8.33	66.19	8.33	25.43	0.000192	0.03
Gli2	87.58	50.83	63.36	8.65	63.36	8.65	22.97	0.000276	0.04
Capn6	75	50.33	68.94	8.66	68.94	8.66	50.05	1.58e-05	0.00844
Crabp1	57.17	31	43.67	8.78	43.67	8.78	31.47	8.87e-05	0.02
Mn1	58.08	37.25	47.58	8.97	47.58	8.97	61.72	7.12e-06	0.00666
Pcdh18	92.33	59.17	75.36	9.15	75.36	9.15	27.33	0.000148	0.03
Nrip3	51.42	32.17	41.06	9.17	41.06	9.17	60.51	7.68e-06	0.00677
Shank3	48.17	35.83	41.97	9.21	41.97	9.21	129.94	3.99e-07	0.00116
Tbx20	101.08	60.17	87.86	9.53	87.86	9.53	35.22	5.87e-05	0.02
Mcc	112.08	71	90.22	9.66	90.22	9.66	56.57	9.92e-06	0.00713
Prkar2b	103.92	75.5	84.39	9.76	84.39	9.76	39.2	3.95e-05	0.01
Reln	76.83	50.75	64.72	10.32	64.72	10.32	64.94	5.86e-06	0.00581
Dll1	72.58	49.67	58	10.49	58	10.49	66.02	5.5e-06	0.00581
Cnksr2	61.25	48	54	11.02	54	11.02	55.14	1.09e-05	0.00733
Fam212b	24.33	18.75	21.97	11.14	21.97	11.14	32.93	7.52e-05	0.02
Plk2	104.42	67.67	90.83	11.25	90.83	11.25	31.63	8.71e-05	0.02
Hs6st2	71.25	52.42	60.36	11.3	60.36	11.3	53.07	1.26e-05	0.0074
Slit3	48	35.33	40.06	11.45	40.06	11.45	24.22	0.000228	0.03
Wnt5b	24.67	17	21.03	11.51	21.03	11.51	32.36	8.01e-05	0.02
Slit2	45.67	36.75	40.06	11.92	40.06	11.92	101.25	1.06e-06	0.00249
Wnt5a	63.33	57.92	60.64	11.97	60.64	11.97	65.61	5.64e-06	0.00581
Smarcd3	61.83	32.08	46.97	12.74	46.97	12.74	19.53	0.000487	0.04
Tenm4	118.25	99.83	108.47	12.83	108.47	12.83	49.17	1.69e-05	0.00863
Apela	65.25	36.5	49.69	13.34	49.69	13.34	32.41	7.97e-05	0.02
Crb2	68.5	43.42	56.17	13.48	56.17	13.48	58.72	8.61e-06	0.007
Lef1	240.25	196.92	218.44	14.49	218.44	14.49	52.7	1.3e-05	0.0074
Adamts3	31	15.42	24.44	14.54	24.44	14.54	22.92	0.000278	0.04
Ncam1	42.33	30.83	37	15.48	37	15.48	52.89	1.28e-05	0.0074
Tmem132c	32.08	17.08	25.42	16	25.42	16	30.89	9.5e-05	0.02
Zcchc24	31.42	18.58	23.97	16.14	23.97	16.14	37.77	4.53e-05	0.01
Rimbp2	28.33	15.75	23.72	17.42	23.72	17.42	25.98	0.000178	0.03
Zeb2	199.42	188.75	191.33	18.05	191.33	18.05	599.6	9.44e-10	9.36e-06
Sall3	148.75	106.67	128.94	20.42	128.94	20.42	39.31	3.9e-05	0.01
Lama4	94.25	55.08	70.72	20.44	70.72	20.44	31.51	8.83e-05	0.02
Vcan	247.75	207	226.47	20.55	226.47	20.55	172.29	1.32e-07	0.000588
Pknox2	50.5	22.58	37.56	21.48	37.56	21.48	20.88	0.000386	0.04
Frem1	69.25	50.5	59.64	22.91	59.64	22.91	34.78	6.15e-05	0.02
T	319.67	191.92	251.78	24.67	251.78	24.67	27.15	0.000152	0.03
Cplx2	34.58	25	29.53	28.26	29.53	28.26	82.35	2.35e-06	0.00346
Vim	573.92	381.17	474.92	28.4	474.92	28.4	57.06	9.6e-06	0.00701
Sox9	40.17	28.75	35.31	29.24	35.31	29.24	50.87	1.48e-05	0.00824
Ccnd2	461.5	421.5	433.94	30.25	433.94	30.25	160.14	1.76e-07	0.000671
Unc5c	132.33	99.17	110.11	34.31	110.11	34.31	91.19	1.59e-06	0.00309
Fbn1	56.83	37.67	47.67	34.65	47.67	34.65	34.27	6.49e-05	0.02
Pmp22	108	80	89.69	34.99	89.69	34.99	53.01	1.27e-05	0.0074
Fbln2	31	26.92	28.78	35.53	28.78	35.53	77.26	3.01e-06	0.00403
RP23-145I16.5	75.5	55.75	63.56	38.51	63.56	38.51	70.57	4.26e-06	0.00487
Kif26b	44.83	21.33	34.5	41.06	34.5	41.06	23.45	0.000256	0.03
Kdr	283.42	208.58	237.78	41.96	237.78	41.96	55.63	1.06e-05	0.00729
Meis2	213.92	106.58	157.53	42.7	157.53	42.7	24.96	0.000205	0.03
Isl1	31.42	23.58	27.17	47.57	27.17	47.57	98.26	1.19e-06	0.00267
Tal1	50.33	44.83	47.36	49.71	47.36	49.71	43.01	2.79e-05	0.01
Rbm24	42.58	27.58	33.78	53.87	33.78	53.87	46.76	2.04e-05	0.00972
Pcdh19	66.17	47.42	57	58	57	58	83.73	2.21e-06	0.00346
Pdgfrb	41.42	30.5	35.92	62.57	35.92	62.57	114.41	6.56e-07	0.00181
Fbn2	131.58	110.08	123.11	63.42	123.11	63.42	219.21	5.11e-08	0.000253
Aplnr	112.08	79	94.89	69.32	94.89	69.32	25.93	0.000179	0.03
Rgs5	44	26.58	36	109	36	109	40.94	3.36e-05	0.01
Cdh11	125.92	100	109.67	113.8	109.67	113.8	70.3	4.33e-06	0.00487
Col1a1	54.58	30.75	42.56	140.27	42.56	140.27	28.13	0.000133	0.03
Foxc1	42.25	23.75	34.53	156.38	34.53	156.38	33.59	6.99e-05	0.02
Gbx2	98.75	43.33	72.06	163.12	72.06	163.12	19.62	0.000479	0.04
Fgf3	101.5	83.08	95.17	286.5	95.17	286.5	78.76	2.79e-06	0.00396
Alcam	35.17	19.92	25.5	∞	25.5	∞	25.07	0.000202	0.03
Bmp5	26.5	15.83	22.36	∞	22.36	∞	26.49	0.000166	0.03
Fli1	48.5	42.92	43.89	∞	43.89	∞	20.98	0.000379	0.04
Foxf1	26.08	17.33	22.33	∞	22.33	∞	26.66	0.000162	0.03
Hapln1	86	54.58	73.06	∞	73.06	∞	42.83	2.83e-05	0.01
Irx5	43.67	40.17	41.72	∞	41.72	∞	295.55	1.57e-08	0.000106
