# Supplementary material for: Disruption of entire Cables2 locus leads to embryonic lethality by diminished Rps21 gene expression and enhanced p53 pathway
Source: eLife. 2021 May 5;10:e50346. doi: 10.7554/eLife.50346 (PMC8099427; doi:10.7554/eLife.50346)
Supplement: Supplementary file 2. — Statistical significance was determined using EDGE test (FDR < 0.05). This gene list is related to Figure 6B–D. [file elife-50346-supp2.xlsx]

## Sheet: WT & KO E6.5 (FDR<0.05)
Feature ID	Experiment - Range (normalized values)	Experiment - IQR (normalized values)	Experiment - Difference (normalized values)	Experiment - Fold Change (normalized values)	EDGE test: WT 6.5 vs KO 6.5, tagwise dispersions - P-value	EDGE test: WT 6.5 vs KO 6.5, tagwise dispersions - Fold change	EDGE test: WT 6.5 vs KO 6.5, tagwise dispersions - Weighted difference	EDGE test: WT 6.5 vs KO 6.5, tagwise dispersions - FDR p-value correction	Note
Rps12	180.833	26.6667	-121.389	-12.0354	2.16638e-06	-12.1931	-5.11288e-05	0.010742	Down
Cables2	39.3333	28.3333	-30	-4.25301	9.05059e-07	-4.1131	-1.25555e-05	0.00560967
Rps21	799.833	514	-596.5	-2.46062	1.44459e-07	-2.60797	-0.000272522	0.0014326
Trp53inp1	314.333	229.333	238.444	2.92036	2.75594e-08	2.89566	9.8755e-05	0.000455512	Up
Ccng1	677	485.167	550.167	3.12237	1.11019e-09	3.00146	0.000222683	2.75244e-05
Phlda3	46.3333	13.5	30.8889	4.03825	1.59252e-06	4.04103	1.317e-05	0.00877389
Cdkn1a	33.6667	14.1667	22.0556	5.0101	3.39992e-07	4.87994	9.70375e-06	0.00280975
Mcam	32.8333	13.6667	21.3333	5	6.36572e-07	5.21765	9.17598e-06	0.0045092
Plk2	59.1667	18.5	34.7222	5.13907	7.27309e-08	5.29536	1.50124e-05	0.000901591
Fam212b	17.6667	5.5	12.5	7.25	1.0659e-05	6.96252	5.45917e-06	0.0480478
Gm20425	22.8333	13.6667	18.7778	16.3636	5.44852e-11	13.2586	8.14073e-06	2.70165e-06

## Sheet: KEGG 2019_Up in KO E6.5
Index	Name	P-value
1	p53 signaling pathway	0.0003431
2	FoxO signaling pathway	0.001179
3	MicroRNAs in cancer	0.005208
4	Thyroid cancer	0.01471
5	Bladder cancer	0.01629
6	Endometrial cancer	0.02297
7	Basal cell carcinoma	0.02493
8	Non-small cell lung cancer	0.0261
9	Renal cell carcinoma	0.02688
10	Melanoma	0.02844
11	Glioma	0.02961
12	Pancreatic cancer	0.02961
13	Chronic myeloid leukemia	0.03
14	ErbB signaling pathway	0.03312
15	Colorectal cancer	0.03467
16	Small cell lung cancer	0.03622
17	Prostate cancer	0.03815
18	HIF-1 signaling pathway	0.04086
19	Parathyroid hormone synthesis, secretion and action	0.04201
20	Cell cycle	0.04816

## Sheet: GO term 2018_Up in KO E6.5
Index	Name	P-value
1	regulation of cyclin-dependent protein kinase activity (GO:1904029)	8.275e-05
2	DNA damage response, signal transduction by p53 class mediator resulting in cell cycle arrest (GO:0006977)	0.0002616
3	signal transduction involved in mitotic G1 DNA damage checkpoint (GO:0072431)	0.0002701
4	regulation of cyclin-dependent protein serine/threonine kinase activity (GO:0000079)	0.0003055
5	regulation of protein serine/threonine kinase activity (GO:0071900)	0.0004356
6	DNA damage response, signal transduction by p53 class mediator (GO:0030330)	0.0004576
7	positive regulation of cell cycle arrest (GO:0071158)	0.0004576
8	cell cycle G1/S phase transition (GO:0044843)	0.0005756
9	small GTPase mediated signal transduction (GO:0007264)	0.0006661
10	G1/S transition of mitotic cell cycle (GO:0000082)	0.0007488
11	long term synaptic depression (GO:0060292)	0.002398
12	cellular response to UV-B (GO:0071493)	0.003196
13	stress-induced premature senescence (GO:0090400)	0.003196
14	angiogenesis involved in wound healing (GO:0060055)	0.003196
15	mitotic cell cycle phase transition (GO:0044772)	0.003257
16	Ras protein signal transduction (GO:0007265)	0.003315
17	Rap protein signal transduction (GO:0032486)	0.003994
18	glomerular filtration (GO:0003094)	0.003994
19	renal filtration (GO:0097205)	0.004392
20	response to UV-B (GO:0010224)	0.005189
21	regulation of centriole replication (GO:0046599)	0.005985
22	negative regulation of phosphate metabolic process (GO:0045936)	0.007576
23	intrinsic apoptotic signaling pathway in response to DNA damage by p53 class mediator (GO:0042771)	0.007973
24	negative regulation of cyclin-dependent protein kinase activity (GO:1904030)	0.008371
25	long-term synaptic potentiation (GO:0060291)	0.008371
26	negative regulation of cell cycle G1/S phase transition (GO:1902807)	0.008768
27	cellular senescence (GO:0090398)	0.009561
28	negative regulation of G1/S transition of mitotic cell cycle (GO:2000134)	0.009561
29	regulation of centrosome duplication (GO:0010824)	0.009958
30	negative regulation of synaptic transmission (GO:0050805)	0.01075
31	positive regulation of fibroblast proliferation (GO:0048146)	0.01115
32	negative regulation of protein kinase B signaling (GO:0051898)	0.01392
33	protein kinase B signaling (GO:0043491)	0.01392
34	cellular response to amino acid starvation (GO:0034198)	0.0155
35	positive regulation of reactive oxygen species metabolic process (GO:2000379)	0.0155
36	cellular response to radiation (GO:0071478)	0.01668
37	intrinsic apoptotic signaling pathway by p53 class mediator (GO:0072332)	0.01707
38	microtubule cytoskeleton organization involved in mitosis (GO:1902850)	0.01747
39	regulation of G1/S transition of mitotic cell cycle (GO:2000045)	0.01826
40	regulation of fibroblast proliferation (GO:0048145)	0.01826
41	cellular response to ionizing radiation (GO:0071479)	0.01826
42	regulation of organelle assembly (GO:1902115)	0.01865
43	intrinsic apoptotic signaling pathway in response to DNA damage (GO:0008630)	0.01904
44	regulation of reactive oxygen species metabolic process (GO:2000377)	0.01944
45	positive regulation of catabolic process (GO:0009896)	0.02454
46	positive regulation of autophagy (GO:0010508)	0.02649
47	positive regulation of synaptic transmission (GO:0050806)	0.02649
48	cellular response to UV (GO:0034644)	0.02649
49	mitotic spindle organization (GO:0007052)	0.02922
50	negative regulation of phosphorylation (GO:0042326)	0.02961
51	response to ionizing radiation (GO:0010212)	0.03039
52	negative regulation of mitotic cell cycle phase transition (GO:1901991)	0.03117
53	positive regulation of protein catabolic process (GO:0045732)	0.03195
54	regulation of protein catabolic process (GO:0042176)	0.03583
55	positive regulation of cellular metabolic process (GO:0031325)	0.03622
56	positive regulation of protein metabolic process (GO:0051247)	0.03777
57	regulation of apoptotic process (GO:0042981)	0.03944
58	intrinsic apoptotic signaling pathway (GO:0097193)	0.0397
59	positive regulation of cellular catabolic process (GO:0031331)	0.04163
60	cellular response to starvation (GO:0009267)	0.04201
61	negative regulation of protein kinase activity (GO:0006469)	0.04278
62	positive regulation of kinase activity (GO:0033674)	0.04432
63	negative regulation of cell growth (GO:0030308)	0.04509
64	regulation of phosphorylation (GO:0042325)	0.04663
65	negative regulation of growth (GO:0045926)	0.04701
66	G2/M transition of mitotic cell cycle (GO:0000086)	0.04931
67	cell cycle G2/M phase transition (GO:0044839)	0.04969
