# Supplementary material for: Disruption of entire Cables2 locus leads to embryonic lethality by diminished Rps21 gene expression and enhanced p53 pathway
Source: eLife. 2021 May 5;10:e50346. doi: 10.7554/eLife.50346 (PMC8099427; doi:10.7554/eLife.50346)
Supplement: Supplementary file 3. — Statistical significance was determined using EDGE test (FDR < 0.05). This gene list is related to Figure 6E–G. [file elife-50346-supp3.xlsx]

## Sheet: WT & KO E7.5_Down_350 genes
Feature ID	Experiment - Range (normalized values)	Experiment - IQR (normalized values)	Experiment - Difference (normalized values)	Experiment - Fold Change (normalized values)	EDGE test: WT 7.5 vs KO 7.5, tagwise dispersions - P-value	EDGE test: WT 7.5 vs KO 7.5, tagwise dispersions - Fold change	EDGE test: WT 7.5 vs KO 7.5, tagwise dispersions - Weighted difference	EDGE test: WT 7.5 vs KO 7.5, tagwise dispersions - FDR p-value correction
1700013H16Rik	20.5	3.16667	-10.5	-2.46512	0.00103619	-2.54121	-5.50829e-06	0.0442164
2510009E07Rik	20	9.5	-13.3889	-4.54412	3.19232e-06	-4.16701	-6.25123e-06	0.000369839
2900011O08Rik	21.8333	13.3333	-16.9444	-5.12162	1.79997e-08	-4.82447	-8.16334e-06	3.94919e-06
A830018L16Rik	13.6667	5.83333	-7.94444	-6.95833	4.2986e-05	-5.89484	-4.19992e-06	0.00339946
Abcg1	19.5	10	-13.1667	-5.64706	4.1602e-07	-5.15827	-6.22468e-06	6.13939e-05
Acta2	51.3333	17.6667	-32.5556	-46.0769	2.50219e-16	-29.3373	-1.52603e-05	2.88537e-13
Adamts12	5.66667	3.5	-4.44444	-21	0.0006061	-11.3666	-2.27982e-06	0.0292989
Adamts20	9.66667	6	-7.55556	-3.47273	0.000531562	-3.36713	-3.91982e-06	0.0264368
Adamtsl2	8	3.5	-4.83333	-18.4	0.000345298	-12.1293	-2.44748e-06	0.0187943
AF529169	15.5	9.5	-10.9444	-3.31765	9.85598e-05	-3.13955	-5.2492e-06	0.00675945
Aff1	113.333	59.5	-74.7778	-2.29175	4.54969e-09	-2.2404	-3.54035e-05	1.23277e-06
Alcam	32.5	17.6667	-22.5556	-8.12281	6.03077e-12	-7.34735	-1.05142e-05	3.35995e-09
Aldh1a2	137.833	50.1667	-84.8333	-153.7	1.05476e-27	-108.352	-4.06835e-05	1.04601e-23
Alx1	11	7.16667	-9.38889	-16.3636	1.20082e-07	-13.834	-4.87092e-06	2.10397e-05
Ankrd45	17	4.66667	-9.61111	-4.08929	0.000124873	-3.77386	-4.59305e-06	0.00822285
Antxr1	33.5	22	-26.5	-3.2823	1.92381e-09	-3.14741	-1.2463e-05	5.67809e-07
Apela	54.3333	28.8333	-36.3889	-3.19799	1.06817e-10	-3.12123	-1.73808e-05	4.45087e-08
Ar	9.33333	4.5	-6.55556	-12.8	4.91286e-05	-9.59598	-3.26281e-06	0.00379446
Arg1	47.6667	1.66667	-20.2222	-9.27273	0.000780368	-8.2233	-9.55998e-06	0.035762
Arhgap24	17.5	8.83333	-12.5556	-3.62791	1.67456e-05	-3.41414	-5.92176e-06	0.00153398
Arhgef10l	20.6667	12.5	-13.1667	-2.24737	0.000283071	-2.26772	-6.55649e-06	0.0160596
Armcx2	69.8333	47.5	-50	-2.01237	7.29013e-07	-1.95515	-2.33409e-05	0.000100691
Armcx3	22	10.8333	-15	-2.66667	1.97717e-05	-2.62278	-7.35016e-06	0.00178576
Arnt2	24.8333	17.5	-19.7222	-2.44898	3.4341e-06	-2.40905	-9.52345e-06	0.000394166
Arrb1	138.667	82.6667	-102.611	-2.11736	1.94679e-09	-2.09599	-4.92753e-05	5.71191e-07
Atoh8	16.3333	9.33333	-11.4444	-42.2	1.58754e-09	-26.8985	-5.69556e-06	4.7708e-07
B3galt5	15.3333	6	-9.61111	-2.74747	0.000796517	-2.66134	-4.60868e-06	0.0362059
B4galnt4	43.5	11.5	-23.8889	-2.9457	1.15692e-05	-3.00348	-1.19881e-05	0.00111824
BC067074	23.1667	8.5	-13.5556	-2.21393	0.000250081	-2.20088	-6.5896e-06	0.0145885
Bmp5	26.8333	15.6667	-19.7222	-7.57407	1.12524e-10	-6.78413	-9.56513e-06	4.64958e-08
C530008M17Rik	89.8333	67.3333	-72.5556	-2.64691	1.11815e-14	-2.60082	-3.48075e-05	1.06622e-11
Cables2	60	41.8333	-50.6111	-5.72021	3.50793e-22	-5.62255	-2.46129e-05	1.4495e-18
Cap2	27.3333	12	-16.3333	-2.44118	0.000260447	-2.39967	-7.88089e-06	0.0150444
Capn6	55.6667	33.6667	-39.2222	-2.06006	2.55993e-07	-2.02355	-1.85354e-05	4.04249e-05
Car3	17.8333	4.33333	-8.11111	-6.61538	0.000309133	-7.17161	-4.33379e-06	0.0172229
Ccdc40	49.5	25.8333	-33.1111	-2.42243	5.97848e-05	-2.32364	-1.54033e-05	0.00445109
Ccdc80	26.1667	22.3333	-21.6111	-6.18667	1.33361e-11	-5.81749	-1.02798e-05	7.11042e-09
Ccnd2	313.333	231	-247.944	-2.407	3.46616e-14	-2.43632	-0.000122766	3.01525e-11
Ccnjl	26.3333	13	-20.5	-2.16038	3.80642e-05	-2.05567	-9.32626e-06	0.00307396
Cd248	7.83333	1.16667	-5.05556	-19.2	0.000225196	-12.213	-2.46563e-06	0.0133889
Cd24a	523.333	272.667	-382.444	-2.27481	9.25974e-17	-2.35637	-0.000194202	1.24093e-13
Cd44	28	12.3333	-17.3333	-2.57576	7.22969e-05	-2.46811	-8.03207e-06	0.00525636
Cdx1	87.8333	14.3333	-51.3889	-55.4118	2.55222e-13	-46.2472	-2.4396e-05	1.83619e-10
Cdx4	45.8333	15.6667	-27.6111	-6.46154	6.71512e-09	-5.92401	-1.28239e-05	1.6902e-06
Cfap52	6	4.33333	-4.44444	-8.27273	0.000870606	-7.42531	-2.43804e-06	0.0387513
Chd7	510	289.833	-348.556	-2.10789	2.00021e-09	-2.16958	-0.000176607	5.80002e-07
Chrdl1	9.66667	6	-7.16667	-8.58824	3.79644e-05	-7.64625	-3.5834e-06	0.00307091
Chrna7	10.1667	2.66667	-6.22222	-5	0.000456515	-4.79534	-3.25705e-06	0.0235441
Cited4	13.3333	4.33333	-8.22222	-9.70588	9.94309e-06	-8.59022	-4.09203e-06	0.00097958
Clmp	19	7	-11.6111	-3.43023	5.63002e-05	-3.215	-5.43284e-06	0.00422977
Cnksr2	51.1667	33.5	-38.4444	-2.92222	1.29672e-10	-2.85191	-1.84192e-05	5.27031e-08
Cntnap2	22.5	15.3333	-17.7222	-2.66146	4.49865e-06	-2.57458	-8.38625e-06	0.000495701
Col13a1	21.1667	9	-13.2222	-3.125	2.68337e-05	-3.109	-6.52069e-06	0.00231803
Col1a1	43.3333	20.5	-28.9444	-3.13525	3.96191e-08	-2.99896	-1.34979e-05	7.70398e-06
Col26a1	10.8333	2.16667	-4.94444	-15.8333	0.000516058	-11.5401	-2.31939e-06	0.0259258
Col2a1	29.3333	14	-20.1111	-4.3211	4.06153e-08	-4.01511	-9.30957e-06	7.83622e-06
Col4a6	13.1667	6.83333	-9.61111	-2.61682	0.000926325	-2.57129	-4.60919e-06	0.0406117
Col5a1	61.1667	14.8333	-32.3889	-2.32802	1.65701e-05	-2.20153	-1.46099e-05	0.00152436
Cpa2	23.3333	2.83333	-12.9444	-3.15741	0.000178033	-3.06845	-6.07216e-06	0.0110072
Cpe	21.5	13.3333	-16.4444	-2.32735	3.19906e-05	-2.26762	-7.76222e-06	0.00269313
Cplx2	27	17.5	-22	-3.55484	3.62924e-09	-3.55681	-1.07618e-05	1.01099e-06
Cpne4	8.33333	4.16667	-6.16667	-3.775	0.00104937	-3.77144	-3.26263e-06	0.0446633
Cpne7	7.83333	2.16667	-5.27778	#N/A	4.24828e-05	-44.2856	-2.61288e-06	0.00336503
Crabp1	55	30.3333	-41.0556	-6.39416	8.1989e-17	-5.89779	-1.90253e-05	1.12928e-13
Crabp2	77.3333	51.6667	-64.1111	-4.67516	1.41971e-21	-4.45891	-3.00145e-05	4.69309e-18
Crmp1	54.5	24.1667	-33.5556	-2.9359	5.71094e-08	-2.80053	-1.55917e-05	1.07672e-05
Ctnnd2	10.5	3	-6.5	-3.48936	0.00105979	-3.67281	-3.57326e-06	0.0450297
Cttnbp2	25.3333	18.3333	-21.3333	-4.76471	1.19555e-10	-4.70851	-1.02837e-05	4.8993e-08
Cxcl12	74.8333	45.5	-50.2778	-2.95043	3.64762e-07	-2.86393	-2.37379e-05	5.51425e-05
Cyfip2	57.6667	26.8333	-39.2778	-2.01	5.79845e-07	-1.93839	-1.80155e-05	8.18811e-05
Daam2	49.6667	19.8333	-31.8889	-3.58559	1.09592e-08	-3.40969	-1.47305e-05	2.5754e-06
Dach1	19.5	9.5	-14.2222	-7.2439	2.53079e-08	-6.70406	-6.71563e-06	5.27265e-06
Dbn1	211.667	155.667	-165.722	-2.92204	4.90912e-13	-2.93418	-8.12139e-05	3.29403e-10
Dcc	4.5	1.83333	-3.38889	#N/A	0.00109143	-30.5919	-1.78628e-06	0.0459084
Dchs1	15.5	6.83333	-10.7222	-5.825	2.21863e-06	-5.56428	-5.37312e-06	0.000270297
Dlg4	49.5	13.6667	-26.0556	-2.56856	3.50162e-05	-2.476	-1.20739e-05	0.0028938
Dll1	66	44.6667	-50.8333	-5.21659	5.48681e-20	-5.02236	-2.39775e-05	1.43191e-16
Dnah5	11.1667	7.83333	-9.22222	-28.6667	9.71147e-08	-21.7167	-4.55612e-06	1.75746e-05
Dnah9	5.83333	0.833333	-3.5	#N/A	0.000584152	-33.2203	-1.94494e-06	0.028509
Dnal1	22.6667	7.33333	-13.5	-2.37288	0.000238857	-2.26811	-6.14959e-06	0.0140829
Dock11	183.667	74.3333	-112.056	-2.18369	1.62155e-08	-2.19016	-5.49643e-05	3.62183e-06
Dpysl4	4.83333	1.16667	-3.5	#N/A	0.00111871	-30.7117	-1.79351e-06	0.0466537
Dusp27	8.33333	6	-6.38889	-4.83333	0.000421565	-4.79998	-3.26241e-06	0.0221867
Dusp4	93.3333	49	-66.9444	-2.19544	2.56899e-11	-2.14278	-3.14377e-05	1.26171e-08
Ece1	135.833	76	-104.5	-2.23831	2.62479e-14	-2.22067	-5.05024e-05	2.41019e-11
Efna2	26.8333	9.83333	-16.6667	-2.31579	8.54997e-05	-2.30039	-8.15891e-06	0.00601348
Efna5	32.3333	13.5	-20.9444	-2.11869	3.68646e-05	-2.07422	-9.99871e-06	0.00302137
Efnb3	18.8333	12.3333	-13.8889	-2.9084	2.27939e-05	-2.92003	-6.85874e-06	0.00202189
Epha4	99.1667	75.5	-88.4444	-2.01144	2.68551e-14	-2.00421	-4.2842e-05	2.42111e-11
Ephb2	56	38.8333	-42.1111	-2.33216	4.19091e-09	-2.23725	-1.94175e-05	1.15448e-06
Epor	4.83333	4.5	-4.33333	-14	0.00060178	-11.3483	-2.27635e-06	0.0292043
Erich2	8.66667	3.5	-5.72222	-3.94286	0.00118297	-4.03741	-3.09061e-06	0.0489631
Eya2	8.83333	8.33333	-8	-14.0909	2.41805e-06	-11.7103	-4.0648e-06	0.000291725
F2r	155.667	79.5	-111.056	-2.16492	6.88596e-11	-2.15269	-5.35623e-05	3.0216e-08
Fam107a	10	1.33333	-6.77778	-4.48571	0.000334337	-4.65463	-3.71999e-06	0.0183792
Fam212a	13.3333	6.83333	-8.5	-4.25532	0.000200927	-4.06709	-4.10059e-06	0.0121796
Fam63b	20	8.66667	-13.1111	-2.01724	0.000542722	-2.04437	-6.56405e-06	0.026884
Fermt3	14.5	3.16667	-8.27778	-2.88608	0.00100664	-2.91717	-4.09501e-06	0.0432906
Fgf13	15.1667	10.1667	-12.3889	-2.53793	0.000191934	-2.52309	-5.92599e-06	0.0117205
Fgf4	32.3333	7.5	-16.3889	-3.10714	3.63957e-05	-3.0069	-7.47767e-06	0.00299284
Flt4	25.6667	7.5	-13.0556	-2.67857	0.000232152	-2.61607	-6.03438e-06	0.0137366
Foxa1	25	6.66667	-13.1111	-2.38824	0.000417112	-2.30941	-6.13225e-06	0.0220027
Foxb1	7.83333	4.83333	-6.55556	#N/A	1.34518e-06	-57.4305	-3.40636e-06	0.000173249
Foxc1	41.8333	23	-32.7222	-17.8286	3.98142e-20	-16.329	-1.55917e-05	1.09677e-16
Foxd4	5.83333	3.83333	-4.77778	-15.3333	0.000328731	-12.086	-2.4383e-06	0.0181314
Foxf1	21.5	9.16667	-13	-2.33714	0.000407623	-2.30689	-6.13228e-06	0.021525
Foxp1	88.8333	52.5	-58.4444	-2.07897	9.43451e-08	-2.02913	-2.74105e-05	1.71359e-05
Frat1	26.1667	12.3333	-18.8889	-3.80992	2.16132e-08	-3.81055	-9.13828e-06	4.59953e-06
Frem1	63	43.5	-45.0556	-3.78694	3.5535e-07	-3.70346	-2.15708e-05	5.40492e-05
Fstl1	194	122	-141.111	-2.5602	2.8486e-12	-2.53711	-6.79563e-05	1.64241e-09
Fzd10	32.5	26.1667	-27	-2.65306	3.25824e-08	-2.59352	-1.28078e-05	6.48835e-06
Fzd3	54.1667	14	-29.2778	-2.0415	3.7826e-05	-2.00393	-1.38296e-05	0.00306972
Gabbr2	14.5	9.33333	-10	-4.46154	2.78203e-05	-4.27418	-4.89788e-06	0.00238662
Gabra4	12.3333	5.83333	-7.88889	-3.08824	0.000519968	-3.24916	-4.08501e-06	0.0260694
Gabrb3	20.8333	11.3333	-14.3333	-2.16216	0.000271862	-2.10589	-6.77008e-06	0.0155482
Gal	8.66667	4.5	-6	#N/A	2.7366e-06	-54.6091	-3.23605e-06	0.000324628
Galnt16	15	13.3333	-13.3889	-22.9091	2.63554e-10	-18.1368	-6.50295e-06	9.53892e-08
Gap43	16.3333	1	-8.72222	-4.41304	0.000184193	-4.17845	-4.24579e-06	0.0113597
Gata1	25.8333	14.3333	-18.2222	-2.17563	4.88601e-05	-2.13789	-8.60144e-06	0.00378551
Gata5	16.6667	6	-9.5	-8.43478	2.97286e-06	-7.76839	-4.7265e-06	0.000347664
Gbx2	89.8333	36.1667	-63.3333	-9.32117	6.08372e-20	-9.01201	-2.98752e-05	1.50831e-16
Gdf11	21.3333	11	-14.7222	-2.25592	0.000209593	-2.16906	-6.78366e-06	0.0126522
Gfi1b	11.1667	4.66667	-5.88889	-7.23529	0.000434121	-6.45693	-2.94013e-06	0.0226112
Gfra2	12.5	4.83333	-8.72222	-4.34043	7.43285e-05	-4.28485	-4.39103e-06	0.0053804
Gli2	70.1667	37.1667	-44.5	-2.73377	2.35824e-08	-2.65202	-2.08718e-05	4.95481e-06
Gli3	122.833	108.333	-101.278	-2.14798	2.2862e-10	-2.11768	-4.82481e-05	8.4598e-08
Gm15564	11.6667	7.66667	-9.05556	-2.64646	0.000827932	-2.69632	-4.43372e-06	0.0371857
Gna14	27	7.83333	-15.2222	-2.63095	0.000148655	-2.53282	-6.93676e-06	0.00943795
Gpr137b	38.3333	7	-22.1667	-3.21667	4.54015e-06	-3.24693	-1.09024e-05	0.000499165
Gpr161	29.5	18.5	-19.7222	-2.58482	2.75338e-06	-2.56957	-9.60501e-06	0.000325838
Gpsm1	48.8333	30.5	-34.8889	-2.3029	1.87586e-07	-2.23836	-1.62615e-05	3.05969e-05
Gucy1a2	11.3333	7.66667	-7.66667	-3.93617	0.00043827	-3.81655	-3.76385e-06	0.0227795
Gucy1a3	26.1667	8.16667	-14.4444	-5.40678	4.2057e-07	-5.80282	-7.19112e-06	6.18811e-05
Gucy1b3	14.3333	13	-13.6111	-7.44737	1.30483e-08	-7.55285	-6.66994e-06	2.97707e-06
H2afy2	89.6667	58	-70.8889	-2.79718	3.11415e-16	-2.71535	-3.32217e-05	3.50943e-13
Hand2	23.1667	11.6667	-15	-4.10345	7.09324e-07	-4.14122	-7.20487e-06	9.82453e-05
Hapln1	63.8333	24.8333	-43.4444	-2.54851	1.52111e-08	-2.45456	-2.00361e-05	3.42837e-06
Hbb-bh1	22.6667	7	-14.7222	#N/A	1.24425e-11	-113.892	-6.81458e-06	6.7061e-09
Hdgfrp3	77.6667	61.8333	-60.8333	-2.49386	5.09189e-09	-2.44067	-2.89385e-05	1.35743e-06
Hey2	13	6.33333	-9	-3.53125	0.000149493	-3.67057	-4.42378e-06	0.00947902
Hhip	7	6	-5.94444	-6.63158	0.000199811	-6.73911	-3.09377e-06	0.0121279
Hist1h2ah	33.8333	13.5	-20.1111	-2.14196	4.06325e-05	-2.129	-9.78904e-06	0.00324439
Hmgb3	176	106.167	-132.222	-2.00126	1.03944e-11	-1.9906	-6.36585e-05	5.69413e-09
Hoxa1	70.5	11.1667	-35.2222	-5.95313	1.39614e-06	-5.84287	-1.66175e-05	0.000177963
Hoxb1	57.1667	24	-39.7778	-32.1304	2.44557e-19	-27.5925	-1.85482e-05	5.51198e-16
Hoxb3os	3.83333	3.16667	-3.44444	#N/A	0.00107623	-30.6054	-1.78709e-06	0.045464
Hoxb4	18.1667	5.66667	-10.5	-3.86364	3.79524e-05	-3.98958	-4.95313e-06	0.00307091
Hs6st2	51.8333	32.6667	-36.6111	-2.29216	3.03156e-08	-2.23135	-1.71588e-05	6.08582e-06
Hyls1	21.6667	10.1667	-15.4444	-2.14876	0.000229354	-2.05687	-6.97794e-06	0.0135872
Ifitm1	38.3333	11.8333	-22.2222	-2.37931	1.50753e-05	-2.3466	-1.06197e-05	0.00139832
Igdcc3	106.167	31.3333	-68.6667	-4.1938	1.6309e-10	-4.10256	-3.24348e-05	6.26883e-08
Igsf10	22.1667	16.3333	-18.0556	-3.66393	3.24506e-08	-3.7101	-8.80987e-06	6.48816e-06
Ikzf1	19.5	10.8333	-14.1111	-3.85393	1.12687e-06	-3.99346	-6.86719e-06	0.000146271
Ikzf4	11.1667	3.83333	-7.11111	-4.04762	0.000477346	-4.04637	-3.58574e-06	0.024326
Ina	44.3333	20.3333	-30.6111	-2.80065	5.13454e-09	-2.78116	-1.4881e-05	1.36148e-06
Irx1	43.8333	27.6667	-33.1667	-3.77674	1.73527e-12	-3.77082	-1.6077e-05	1.02432e-09
Irx5	41.1667	36	-37.0556	-9.55128	7.49796e-22	-9.24028	-1.75903e-05	2.8599e-18
Isl1	28.3333	18.5	-21.7222	-4.49107	1.57389e-10	-4.56584	-1.04565e-05	6.14498e-08
Itga2b	17.6667	10.8333	-13	-3.68966	5.88624e-06	-3.71181	-6.22251e-06	0.000626328
Itga4	28.1667	13.5	-20.6111	-9.83333	3.69803e-12	-9.30274	-9.77255e-06	2.10766e-09
Jag1	56	45.3333	-45.1667	-2.45438	4.42511e-09	-2.38122	-2.11982e-05	1.2056e-06
Jdp2	19	2.33333	-9.77778	-2.49153	0.000901495	-2.6264	-5.03027e-06	0.0396986
Kalrn	72	40.6667	-52.8333	-2.02922	2.17531e-08	-1.9762	-2.46313e-05	4.60952e-06
Kcna2	11.5	7	-9.11111	#N/A	2.48918e-08	-73.6845	-4.38751e-06	5.20785e-06
Kcnd3	9.83333	2.16667	-5.55556	-17.6667	0.00021378	-12.8631	-2.60919e-06	0.0128644
Kcnq2	12.6667	6	-7.83333	-11.8462	9.15252e-06	-10.8896	-3.75241e-06	0.000911301
Kif21b	66	53.3333	-59.6111	-2.0666	2.56998e-11	-2.04249	-2.8516e-05	1.26171e-08
Kif26b	33.6667	11.6667	-24	-3.13861	1.81793e-07	-2.98333	-1.08789e-05	2.97499e-05
Kif5c	85.8333	70	-67.5556	-2.31602	4.17933e-11	-2.2731	-3.21122e-05	1.93675e-08
Kit	81.3333	24.5	-46	-2.35961	1.84902e-06	-2.25395	-2.10424e-05	0.000228129
Kitl	58.6667	36.5	-48.6111	-2.38449	1.5626e-10	-2.3477	-2.32959e-05	6.14498e-08
Klhl29	21.8333	8	-13.6111	-4.35616	3.53276e-06	-4.18398	-6.28493e-06	0.000403622
Lef1	165.167	115.667	-120.833	-2.16497	2.76547e-09	-2.15068	-5.83039e-05	7.88079e-07
Lfng	23.5	13.1667	-13.2222	-2.60811	0.000457902	-2.55958	-6.2942e-06	0.023553
Limch1	47.8333	22.8333	-31.7222	-2.87829	2.69623e-08	-2.81902	-1.49033e-05	5.57052e-06
Lrch2	33.1667	17.8333	-25.8333	-2.21094	1.48129e-06	-2.19333	-1.24439e-05	0.000186896
Lrp4	44.8333	32.3333	-36.2222	-2.20741	2.89717e-08	-2.14433	-1.68635e-05	5.88755e-06
Lrrc4b	10.1667	4.83333	-5.33333	-5.17391	0.000691561	-6.14364	-2.77465e-06	0.0325342
Lrrc8c	20.5	9.83333	-14.6667	-2.163	0.000199828	-2.1084	-6.78859e-06	0.0121279
Lrrn1	18.6667	6.33333	-11.8333	-2.14516	0.000602524	-2.1499	-5.75806e-06	0.0292043
Lsp1	9.33333	6.16667	-7.11111	-3.61224	0.000974776	-3.56881	-3.43405e-06	0.0422133
Ltbp1	31.6667	17	-19.5	-2.31955	2.96653e-05	-2.2395	-8.96322e-06	0.00251445
Maml2	13.5	9	-9.83333	-3.90164	6.8031e-05	-3.86842	-4.74796e-06	0.00499751
Map1a	54.3333	38.6667	-41.0556	-2.62775	1.46006e-10	-2.55489	-1.91815e-05	5.83848e-08
Mapk12	11.8333	7.33333	-9.22222	-2.90805	0.000541034	-2.93451	-4.43743e-06	0.026854
Mapk8ip2	29.5	7.33333	-15.1111	-2.0625	0.000816176	-1.97291	-6.73638e-06	0.036791
Marcks	225.5	164	-172.111	-2.29407	9.54083e-10	-2.3126	-8.44124e-05	2.97536e-07
Mcc	92.8333	54	-72.1667	-3.78755	1.64706e-19	-3.65318	-3.35977e-05	3.88903e-16
Mcf2	35.1667	11.3333	-19.3889	-3.01734	2.90046e-06	-2.96576	-9.21496e-06	0.000340804
Mcoln3	34.3333	16.6667	-22.8333	-3.68627	6.32407e-09	-3.71141	-1.09817e-05	1.61639e-06
Mef2c	17	9	-11.8889	-4.34375	2.59991e-06	-4.54681	-5.87397e-06	0.000309153
Meis2	190	84.3333	-131.556	-6.44368	9.28405e-23	-6.27552	-6.2566e-05	4.75562e-19
Meox1	19	1	-8.72222	-8.85	0.000194003	-8.45027	-4.01276e-06	0.0118323
Mgat3	16.5	8.33333	-13.3889	-2.85385	2.74007e-05	-2.95982	-6.68638e-06	0.00235879
Mn1	52.3333	30.8333	-41.1111	-4.50711	1.23975e-16	-4.55022	-2.00438e-05	1.61771e-13
Mrc2	43.8333	14.6667	-24.6667	-2.00452	0.000118395	-1.9462	-1.13549e-05	0.00784843
Msgn1	39.1667	13.6667	-27.8889	-21.9167	4.90664e-14	-19.6306	-1.2998e-05	4.12365e-11
Mtss1	85.8333	48.8333	-58.1111	-2.09186	1.01364e-08	-2.02468	-2.68561e-05	2.42809e-06
Myb	37.5	31.5	-29.8333	-2.55202	3.99322e-08	-2.48925	-1.40943e-05	7.73452e-06
Myl7	14.1667	6.5	-9.11111	-3.15789	0.000332556	-3.24217	-4.42827e-06	0.0183017
Myl9	16.8333	6.66667	-10.4444	-2.93814	0.000156717	-3.07138	-5.0852e-06	0.00987396
Myo5c	23.3333	13.5	-17.8333	-3.05769	9.00333e-07	-2.99064	-8.37558e-06	0.000119686
Ncam1	28.1667	17.1667	-22.7778	-2.38047	1.61408e-06	-2.31633	-1.05794e-05	0.000202107
Ncs1	39.6667	26.3333	-29	-2.07851	1.99432e-06	-2.05951	-1.39157e-05	0.000244773
Nebl	7.66667	4.83333	-6.11111	-5.23077	0.000395886	-5.43108	-3.09597e-06	0.0209722
Nes	139.167	98.8333	-100.167	-2.47545	1.21972e-08	-2.44116	-4.7662e-05	2.81301e-06
Nexn	23	17.6667	-19.5	-3.16667	1.08378e-07	-3.13549	-9.3268e-06	1.94707e-05
Nfib	20.8333	9.33333	-14.5	-3.02326	8.96992e-06	-3.10227	-7.17206e-06	0.000898256
Nhs	25.5	21.5	-19.5556	-2.23509	2.62812e-05	-2.19589	-9.22198e-06	0.00227824
Nhsl2	60.3333	30.5	-40.5	-2.6382	3.41056e-09	-2.53884	-1.87356e-05	9.60868e-07
Nkx1-2	19	6.5	-12.7222	-39.1667	2.32603e-09	-27.2729	-5.7772e-06	6.66682e-07
Nkx6-1	4.83333	2.16667	-3.38889	#N/A	0.00109122	-30.5902	-1.78618e-06	0.0459084
Noto	8	3	-4.94444	-5.45	0.00106889	-5.82268	-2.59969e-06	0.0452226
Nptx2	30.1667	18	-19.8889	-2.20539	3.43783e-05	-2.15279	-9.26086e-06	0.00285536
Nrip3	32.1667	16.6667	-23.1111	-2.02716	2.8117e-05	-1.9623	-1.05036e-05	0.00239963
Nrxn2	13.8333	9.83333	-11.2778	-2.56154	0.00020718	-2.63402	-5.57394e-06	0.0125281
Ntm	10.5	1.16667	-5.44444	-6.15789	0.000783734	-6.12875	-2.76502e-06	0.0358832
Ntn1	60.1667	19.1667	-36.5	-2.84034	1.15596e-07	-2.70129	-1.66234e-05	2.04573e-05
Ntng1	10	2.16667	-5.27778	-8.30769	0.000547308	-7.47789	-2.459e-06	0.0270301
Olfml2a	29.3333	14.6667	-21.8889	-3.31765	1.88044e-08	-3.33936	-1.05892e-05	4.0717e-06
Olfml3	8.66667	6	-5.94444	-4.68966	0.00115838	-4.42659	-2.93973e-06	0.0481056
Pank1	19.8333	8.83333	-12.1111	-2.19126	0.000575601	-2.19119	-5.77554e-06	0.0281749
Pappa	24.6667	6.33333	-14.1667	-2.41667	9.66189e-05	-2.44556	-7.00151e-06	0.00667249
Pax2	5	3.16667	-4	#N/A	0.000552504	-33.3064	-1.95014e-06	0.0272596
Pbx1	220.667	140.833	-168.667	-2.4375	1.93578e-11	-2.43565	-8.1873e-05	9.79445e-09
Pcdh19	61.6667	44.1667	-50.5	-8.76923	2.3075e-27	-8.69933	-2.37872e-05	1.90696e-23
Pdgfc	8.66667	3.83333	-5.61111	-6.05	0.000611713	-6.14199	-2.77184e-06	0.0294484
Pdgfrb	31.1667	20	-23.9444	-2.92411	2.98127e-08	-2.90041	-1.13375e-05	6.03372e-06
Pdzrn3	30.1667	20.3333	-23.3889	-2.48239	1.05603e-06	-2.39249	-1.075e-05	0.000138162
Pecam1	16.8333	8	-12.1111	-2.09	0.000768801	-2.05845	-5.63741e-06	0.0353955
Peli2	40.3333	31.6667	-32.1111	-2.0377	5.89728e-07	-2.00893	-1.51868e-05	8.23709e-05
Pknox2	44.6667	17.6667	-31	-4.82192	1.38589e-11	-4.69914	-1.43822e-05	7.24334e-09
Plxnc1	15.6667	10.6667	-10.7778	-3.04211	0.000130555	-2.94492	-5.07771e-06	0.00846219
Pmp22	93.5	45.1667	-61.7222	-3.18701	6.10417e-11	-3.15143	-2.93253e-05	2.70246e-08
Popdc2	12.6667	1.16667	-6.72222	-10.3077	9.81013e-05	-9.28176	-3.14187e-06	0.00674667
Pot1b	40.8333	14.1667	-26.6111	-2.06682	8.15036e-06	-2.08776	-1.30912e-05	0.000829847
Prkar2b	90	67.3333	-66.3889	-3.64381	9.17383e-11	-3.58947	-3.17925e-05	3.8879e-08
Prr5l	18.8333	8.83333	-12	-2.8	0.000101143	-2.86043	-5.75219e-06	0.00687012
Prrx1	16.8333	1.66667	-8.05556	-3.63636	0.000797024	-3.75188	-3.68276e-06	0.0362059
Prrx2	9.33333	1	-5.61111	-17.8333	0.000338473	-12.3537	-2.49711e-06	0.018545
Prtg	1246.17	824.5	-954.167	-2.53705	4.44089e-16	-2.58367	-0.000468193	4.78699e-13
Prune2	16.8333	4.66667	-10	-4.67347	5.54973e-06	-5.51695	-5.31926e-06	0.000595635
Ptn	68.1667	25.3333	-43	-7.45	1.96988e-15	-7.49742	-2.00916e-05	1.95353e-12
Ptpre	17.5	5.66667	-10.2222	-2.95745	0.000303073	-2.95083	-4.78553e-06	0.0169806
Ptprz1	11.6667	9.5	-8.94444	-3.36765	0.000222533	-3.43196	-4.4136e-06	0.0132465
Rab8b	106	74.1667	-80.5	-2.23846	8.16767e-13	-2.18939	-3.78595e-05	5.25966e-10
Radil	21.8333	10.1667	-12.5	-2.26404	0.000426631	-2.26748	-5.94292e-06	0.022357
Rarb	19.3333	8.83333	-11.8333	-12.2105	7.14398e-08	-11.0439	-5.41212e-06	1.33171e-05
Rarg	74.5	57.1667	-60.4444	-2.52168	4.78911e-13	-2.4557	-2.83888e-05	3.29403e-10
Rasgrp3	63.8333	27.5	-43.3889	-2.31703	5.07379e-08	-2.24748	-1.99718e-05	9.71366e-06
Rassf2	21.8333	15.5	-15.7222	-2.14113	0.000138374	-2.14248	-7.54836e-06	0.00887617
Rbm24	38	22	-28.1111	-5.47788	1.41427e-13	-5.51578	-1.32402e-05	1.06253e-10
Rbm41	21.5	17	-17.7222	-2.08874	8.94338e-05	-2.04795	-8.25752e-06	0.0062196
Rbms3	11.5	5.5	-7.33333	-3.69388	0.000671701	-3.6877	-3.59206e-06	0.0317808
Rcsd1	15.5	3	-9.83333	-2.77	0.000817639	-2.71726	-4.48657e-06	0.0367916
Reln	59	33	-45.5556	-2.84685	3.75757e-12	-2.75057	-2.1054e-05	2.11726e-09
Rgma	51.3333	34.5	-40.3333	-3.21341	7.55732e-13	-3.12243	-1.87498e-05	4.93065e-10
Rgs10	14.1667	2.83333	-8.94444	-2.61	0.00110903	-2.68682	-4.40717e-06	0.0463671
Rgs5	35.5	18	-27	-3.94545	7.60492e-11	-3.91733	-1.27435e-05	3.27904e-08
Rhobtb3	103.833	41.3333	-70.5556	-2.35394	1.99465e-09	-2.31576	-3.36554e-05	5.80002e-07
Rnf122	18.6667	8.83333	-13.3889	-3.41	1.03816e-05	-3.39308	-6.25189e-06	0.00101333
Rnf144a	31.3333	27.6667	-25.5	-2.28571	1.41541e-06	-2.23414	-1.18825e-05	0.000179957
Rnf213	171.333	58.5	-97.6667	-2.751	1.59142e-08	-2.70126	-4.62087e-05	3.57062e-06
Ror1	44	30.1667	-36.6667	-3.82051	2.12321e-13	-3.77801	-1.74449e-05	1.57134e-10
Ror2	48.3333	29.1667	-36.3333	-2.10473	1.29926e-07	-2.04179	-1.6681e-05	2.24363e-05
RP23-145I16.5	66.8333	44.1667	-49.3333	-4.35094	5.34252e-17	-4.2779	-2.3193e-05	8.22793e-14
Rps21	323.667	273.5	-278.667	-2.16273	9.59084e-23	-2.20917	-0.000138882	4.75562e-19
Rspo3	72.6667	27.1667	-49.5556	-2.22696	2.76038e-08	-2.17068	-2.28591e-05	5.67939e-06
Runx1t1	21.5	11.3333	-14.5	-2.43407	9.45575e-05	-2.39383	-6.7528e-06	0.00655753
Sall3	100.5	51.1667	-66.4444	-2.01961	8.0805e-07	-1.98864	-3.13893e-05	0.000109773
Samd14	14.6667	8.83333	-11.6667	-4.18182	3.99588e-06	-4.44525	-5.70644e-06	0.000447259
Scara3	8.83333	7.5	-7.44444	-6.58333	2.12428e-05	-7.94028	-3.74201e-06	0.00190131
Sdc2	24.5	20.1667	-21.8333	-2.2205	6.0583e-06	-2.17702	-1.02137e-05	0.00063915
Sdk2	25.5	8.5	-16.9444	-3.47967	8.0224e-07	-3.38915	-7.76316e-06	0.000109283
Sept3	28.1667	17.6667	-22	-3.89051	7.57272e-10	-3.97103	-1.0608e-05	2.43827e-07
Setbp1	56.6667	30.3333	-41.3333	-2.55649	1.43005e-07	-2.48981	-1.92945e-05	2.41187e-05
Sfrp2	27.1667	8	-17.7222	-2.375	2.32273e-05	-2.36804	-8.37961e-06	0.00204933
Sh3gl3	12.5	6	-8.72222	-2.72527	0.000879948	-2.79774	-4.12298e-06	0.0389085
Sh3kbp1	49	31.1667	-37.2222	-2.64619	1.48193e-09	-2.57865	-1.74508e-05	4.50806e-07
Shc2	19.1667	13	-16.1111	-2.6763	7.77692e-06	-2.67	-7.56238e-06	0.00079509
Shh	8	7.33333	-7.66667	#N/A	3.42976e-07	-62.8379	-3.73277e-06	5.23275e-05
Shisa2	29.8333	7.83333	-15.1111	-2.20354	0.000526179	-2.13459	-6.76516e-06	0.0262217
Sirpa	43.3333	14.5	-25.5	-3.17536	2.33394e-07	-3.16528	-1.22081e-05	3.73317e-05
Six1	12.8333	4.16667	-8.22222	-11.5714	5.18016e-06	-11.2986	-3.90804e-06	0.000560826
Six4	60.3333	33.6667	-45.2222	-2.69231	1.38775e-11	-2.62735	-2.11294e-05	7.24334e-09
Slc18a2	13.6667	10.3333	-11.5556	-3.66667	9.64913e-06	-3.89059	-5.70992e-06	0.000954994
Slfn9	33.6667	10.5	-19.2778	-2.35547	1.35444e-05	-2.42662	-9.64604e-06	0.00128391
Slit2	38.1667	24.6667	-29.7222	-3.19262	2.53818e-10	-3.16394	-1.39434e-05	9.25409e-08
Slit3	38.5	24.5	-25.0556	-2.36667	2.08323e-05	-2.29461	-1.16027e-05	0.00187132
Smarcd3	49.6667	15.1667	-30.5	-2.54648	5.28035e-07	-2.49868	-1.42186e-05	7.58917e-05
Smoc2	12.8333	4.5	-7.22222	-4.61111	0.000274798	-5.00377	-3.43607e-06	0.015698
Smtnl2	28.5	24.8333	-24.3889	-2.50859	2.30207e-07	-2.49154	-1.15107e-05	3.70611e-05
Snai2	15.8333	4.83333	-9.66667	-7	1.58523e-06	-7.9696	-4.86822e-06	0.000199501
Snn	45	16.6667	-29.8889	-2.08687	1.81305e-06	-2.09208	-1.45332e-05	0.00022475
Sort1	74.1667	55.8333	-59.1111	-2.20772	3.56896e-11	-2.16297	-2.78934e-05	1.70161e-08
Sox9	34.6667	19.6667	-26.4444	-3.67416	3.38836e-10	-3.63302	-1.23392e-05	1.20872e-07
Sp8	32.5	14.6667	-22.8333	-2.35197	2.05541e-06	-2.38154	-1.11019e-05	0.000251648
Spin2c	59.5	39.6667	-44.0556	-2.26677	5.30291e-09	-2.21336	-2.05922e-05	1.39864e-06
Sptb	73.8333	33.1667	-47.3889	-3.39607	4.08974e-11	-3.339	-2.21334e-05	1.93133e-08
Stmn2	25.8333	4.5	-16.3889	-2.3785	0.000242178	-2.30218	-7.34592e-06	0.0142618
Stox2	56.6667	38.1667	-43.2222	-2.63789	3.30577e-10	-2.56717	-2.00739e-05	1.1878e-07
Stra6	17.5	5.33333	-9.77778	-7.76923	2.5019e-06	-8.11119	-4.96495e-06	0.000299653
Stum	9.66667	2.83333	-6.44444	#N/A	6.01408e-06	-51.9758	-3.07709e-06	0.000637197
Svep1	28.5	13.1667	-18.4444	-6.26984	1.68626e-08	-6.11415	-8.45405e-06	3.73274e-06
Syne2	211.5	129.667	-142.778	-2.47786	2.32764e-07	-2.47634	-6.94828e-05	3.73317e-05
Tagln	10.8333	5.33333	-7.55556	-3.47273	0.000638519	-3.69731	-3.60579e-06	0.0303848
Tal2	14.3333	3	-8.22222	-6.48148	7.85092e-05	-6.20924	-3.63861e-06	0.00564185
Tbx4	11.6667	4.16667	-7.77778	#N/A	8.42106e-07	-57.8818	-3.43361e-06	0.000113776
Tbx6	21.1667	9.66667	-13.6111	-4.31081	8.84761e-07	-4.52608	-6.4028e-06	0.00011825
Tcf21	6.5	4.83333	-5.55556	#N/A	3.70262e-05	-44.0746	-2.60014e-06	0.00302961
Tdo2	21.5	15.1667	-16.0556	-6.35185	3.98e-09	-6.72996	-7.65768e-06	1.1025e-06
Tenm4	90	62.3333	-65.7222	-2.34892	6.76754e-07	-2.30713	-3.10391e-05	9.39968e-05
Tfap2a	23.1667	13.8333	-17.5	-6	9.70148e-10	-6.56067	-8.32146e-06	3.00655e-07
Thsd4	12.1667	7.83333	-8.22222	-3.24242	0.000556709	-3.37529	-3.93263e-06	0.0273854
Thsd7a	17.6667	7.33333	-11	-2.62295	0.000178962	-2.8362	-5.67799e-06	0.0110508
Thy1	9.66667	5.33333	-6.55556	-4.6875	0.000442302	-4.79553	-3.25618e-06	0.022965
Timp2	36.1667	27.8333	-28.7222	-4.05917	1.53903e-10	-3.98591	-1.34946e-05	6.10504e-08
Tmem108	11	7.33333	-8.44444	-3.4127	0.000155627	-3.83707	-4.24563e-06	0.0098178
Tmem132c	28	14.1667	-22.5	-5.7093	4.44128e-11	-5.92905	-1.05235e-05	2.03908e-08
Tnfaip2	8.5	4	-5.5	-4.96	0.000623437	-6.13842	-2.7702e-06	0.0298102
Tnnt2	20.8333	5	-14.7222	-12.0417	1.18668e-08	-13.4166	-6.6968e-06	2.7496e-06
Tpbg	23.6667	9.83333	-15.5556	-2.22271	0.000108794	-2.20897	-7.39782e-06	0.00733952
Trabd2b	25	9.83333	-16.5556	-2.63736	1.3038e-05	-2.62517	-7.62159e-06	0.00124805
Trp53i11	51.5	42.1667	-40.8889	-2.48988	4.89983e-10	-2.44024	-1.91413e-05	1.66409e-07
Ttbk2	17.6667	2.33333	-9.72222	-2.38889	0.000939037	-2.5005	-4.87607e-06	0.0410601
Ttc25	7.83333	4.66667	-6	-6.4	0.00060311	-6.14472	-2.77298e-06	0.0292043
Tub	17.3333	8.5	-10.5556	-2.42857	0.000428785	-2.49336	-5.09197e-06	0.0223803
Tubb4a	37.5	19.5	-23.1111	-2.20231	1.29979e-05	-2.18012	-1.07938e-05	0.00124662
Tvp23a	6.5	3.33333	-4.55556	#N/A	0.000285693	-36.0106	-2.11337e-06	0.0161713
Twist1	40.5	34.5	-36.7778	-4.63736	1.47918e-16	-4.75828	-1.76223e-05	1.78891e-13
Unc5c	98.5	64.1667	-74.1667	-3.06019	8.35168e-18	-3.0164	-3.51835e-05	1.47899e-14
Vash2	36.1667	13.3333	-21.8889	-2.30464	9.26916e-06	-2.25792	-1.01024e-05	0.000921065
Vim	381.167	187.333	-256.278	-2.23013	1.37845e-12	-2.25788	-0.000125891	8.40837e-10
Vopp1	18.3333	11.6667	-11.7778	-2.07071	0.00106282	-2.08728	-5.61402e-06	0.0450889
Wdr86	35.3333	15.1667	-20.6667	-2.55649	7.24684e-06	-2.56883	-9.84617e-06	0.000747058
Wnt3a	18.8333	9.16667	-11.3333	-6.1	4.15221e-07	-7.74231	-5.7935e-06	6.13939e-05
Wnt5a	52.6667	39.3333	-40.6111	-2.67277	7.6386e-10	-2.6405	-1.91892e-05	2.44361e-07
Wnt5b	14.8333	9.5	-12.1667	-2.1005	0.000611197	-2.11945	-5.78408e-06	0.0294484
Wnt8a	23.5	15.6667	-18.5556	-3.28767	9.21306e-08	-3.36911	-8.83732e-06	1.67952e-05
Ypel1	19.6667	14	-15.5	-2.43814	1.70407e-05	-2.50751	-7.54618e-06	0.00155324
Zcchc24	24.1667	11.6667	-16.8889	-2.9	1.20311e-06	-3.02072	-8.18409e-06	0.00015576
Zdbf2	83.6667	59	-69.8889	-2.11723	1.00212e-12	-2.10747	-3.36349e-05	6.28988e-10
Zeb1	43.5	9.66667	-24.0556	-2.41042	1.50873e-05	-2.36057	-1.09338e-05	0.00139832
Zeb2	136.833	122.333	-126.944	-2.87911	3.93603e-29	-2.86169	-6.10073e-05	6.5056e-25
Zfp503	28.3333	8.5	-15.5556	-19.6667	3.68579e-10	-33.8513	-7.23027e-06	1.26917e-07
Zfp521	54.5	26.8333	-36.8333	-2.58993	2.86752e-08	-2.53133	-1.71668e-05	5.85128e-06
Zfp618	39	15.8333	-22.5556	-2.27273	2.31159e-05	-2.19922	-1.02047e-05	0.00204314
Zfp711	34.5	13.5	-22.0556	-2.20669	1.42523e-05	-2.18783	-1.04848e-05	0.00133845
Zhx2	19.8333	11.6667	-12.9444	-2.49359	0.000132785	-2.50631	-6.09491e-06	0.0085731
Zswim6	27.5	23.5	-23	-2.0481	1.54401e-05	-2.01458	-1.0743e-05	0.00142791

## Sheet: KEGG 2019_Down in KO E7.5
Index	Name	P-value
1	Axon guidance	4.299e-10
2	Pathways in cancer	1.594e-09
3	Basal cell carcinoma	1.101e-08
4	Breast cancer	4.8e-08
5	Hippo signaling pathway	8.311e-07
6	Wnt signaling pathway	8.966e-07
7	Hedgehog signaling pathway	1.039e-05
8	Gastric cancer	1.357e-05
9	Focal adhesion	5.139e-05
10	PI3K-Akt signaling pathway	6.371e-05
11	Melanogenesis	6.522e-05
12	Human papillomavirus infection	7.09e-05
13	Proteoglycans in cancer	0.0002532
14	Rap1 signaling pathway	0.0003305
15	ECM-receptor interaction	0.0006289
16	Signaling pathways regulating pluripotency of stem cells	0.0006989
17	MAPK signaling pathway	0.0007204
18	Hepatocellular carcinoma	0.0008877
19	Hematopoietic cell lineage	0.001317
20	Cell adhesion molecules (CAMs)	0.003118
21	Leukocyte transendothelial migration	0.004133
22	Protein digestion and absorption	0.004997
23	Transcriptional misregulation in cancer	0.005053
24	Regulation of actin cytoskeleton	0.005053
25	Cushing syndrome	0.007021
26	Ras signaling pathway	0.008194
27	Notch signaling pathway	0.01052
28	Platelet activation	0.02277
29	Prostate cancer	0.02783
30	Relaxin signaling pathway	0.02785
31	Nicotine addiction	0.03259
32	Phospholipase D signaling pathway	0.04737

## Sheet: GO term 2018_Down in KO E7.5
Index	Name	P-value
1	axon guidance (GO:0007411)	4.939e-17
2	axonogenesis (GO:0007409)	2.259e-14
3	positive regulation of transcription from RNA polymerase II promoter (GO:0045944)	1.73e-13
4	regulation of transcription from RNA polymerase II promoter (GO:0006357)	3.856e-12
5	nervous system development (GO:0007399)	2.666e-11
6	positive regulation of transcription, DNA-templated (GO:0045893)	1.136e-10
7	circulatory system development (GO:0072359)	7.52e-10
8	heart development (GO:0007507)	1.084e-09
9	digestive tract development (GO:0048565)	2.72e-09
10	regulation of cell migration (GO:0030334)	9.587e-09
11	negative regulation of transcription, DNA-templated (GO:0045892)	3.894e-08
12	negative regulation of cell differentiation (GO:0045596)	6.293e-08
13	inner ear morphogenesis (GO:0042472)	6.44e-08
14	renal system development (GO:0072001)	6.954e-08
15	negative regulation of axonogenesis (GO:0050771)	9.119e-08
16	ear morphogenesis (GO:0042471)	1.268e-07
17	neuron projection morphogenesis (GO:0048812)	1.893e-07
18	negative regulation of neuron projection development (GO:0010977)	2.212e-07
19	embryonic organ development (GO:0048568)	3.124e-07
20	Wnt signaling pathway (GO:0016055)	4.678e-07
21	mesenchymal cell differentiation (GO:0048762)	4.689e-07
22	negative regulation of apoptotic process (GO:0043066)	4.851e-07
23	chordate embryonic development (GO:0043009)	5.1e-07
24	respiratory system development (GO:0060541)	5.304e-07
25	cellular response to retinoic acid (GO:0071300)	5.704e-07
26	response to retinoic acid (GO:0032526)	5.964e-07
27	metanephric mesenchyme development (GO:0072075)	6.758e-07
28	cardiac ventricle morphogenesis (GO:0003208)	6.902e-07
29	branching morphogenesis of an epithelial tube (GO:0048754)	6.902e-07
30	gland development (GO:0048732)	7.16e-07
31	epithelium development (GO:0060429)	8.382e-07
32	embryonic digestive tract development (GO:0048566)	8.67e-07
33	cell morphogenesis involved in neuron differentiation (GO:0048667)	1.047e-06
34	dendrite morphogenesis (GO:0048813)	1.093e-06
35	positive regulation of protein phosphorylation (GO:0001934)	1.133e-06
36	kidney development (GO:0001822)	1.431e-06
37	embryonic limb morphogenesis (GO:0030326)	1.696e-06
38	regulation of NMDA receptor activity (GO:2000310)	1.829e-06
39	negative regulation of transcription from RNA polymerase II promoter (GO:0000122)	2.641e-06
40	positive regulation of ERK1 and ERK2 cascade (GO:0070374)	2.741e-06
41	negative regulation of signal transduction (GO:0009968)	2.792e-06
42	generation of neurons (GO:0048699)	3.099e-06
43	respiratory tube development (GO:0030323)	3.679e-06
44	vasculature development (GO:0001944)	4.146e-06
45	embryonic cranial skeleton morphogenesis (GO:0048701)	4.146e-06
46	regulation of axonogenesis (GO:0050770)	4.828e-06
47	canonical Wnt signaling pathway (GO:0060070)	5.033e-06
48	nose development (GO:0043584)	6.105e-06
49	neuron differentiation (GO:0030182)	6.225e-06
50	regulation of ERK1 and ERK2 cascade (GO:0070372)	7.934e-06
51	lung development (GO:0030324)	9.302e-06
52	skeletal muscle organ development (GO:0060538)	9.302e-06
53	skeletal system development (GO:0001501)	1.031e-05
54	artery morphogenesis (GO:0048844)	1.146e-05
55	negative regulation of multicellular organismal process (GO:0051241)	1.263e-05
56	skeletal system morphogenesis (GO:0048705)	1.4e-05
57	cartilage development (GO:0051216)	1.409e-05
58	negative regulation of response to stimulus (GO:0048585)	1.469e-05
59	regulation of signal transduction (GO:0009966)	1.637e-05
60	positive regulation of cell motility (GO:2000147)	1.694e-05
61	central nervous system projection neuron axonogenesis (GO:0021952)	1.781e-05
62	negative regulation of embryonic development (GO:0045992)	1.781e-05
63	positive regulation of phosphorylation (GO:0042327)	1.907e-05
64	stem cell differentiation (GO:0048863)	2.045e-05
65	regulation of transcription, DNA-templated (GO:0006355)	2.095e-05
66	regulation of epithelial to mesenchymal transition (GO:0010717)	2.406e-05
67	embryonic skeletal system morphogenesis (GO:0048704)	2.577e-05
68	positive regulation of nucleic acid-templated transcription (GO:1903508)	2.861e-05
69	central nervous system development (GO:0007417)	3.053e-05
70	urogenital system development (GO:0001655)	3.287e-05
71	digestive system development (GO:0055123)	3.287e-05
72	positive regulation of cell differentiation (GO:0045597)	3.95e-05
73	axon development (GO:0061564)	3.997e-05
74	positive regulation of branching involved in ureteric bud morphogenesis (GO:0090190)	4.084e-05
75	cell morphogenesis involved in differentiation (GO:0000904)	4.135e-05
76	T cell differentiation (GO:0030217)	4.734e-05
77	regulation of ossification (GO:0030278)	4.734e-05
78	receptor clustering (GO:0043113)	5.155e-05
79	positive regulation of MAPK cascade (GO:0043410)	5.434e-05
80	cranial nerve development (GO:0021545)	5.817e-05
81	negative regulation of Wnt signaling pathway (GO:0030178)	5.907e-05
82	positive regulation of embryonic development (GO:0040019)	6.352e-05
83	positive regulation of cell proliferation (GO:0008284)	6.381e-05
84	sensory organ development (GO:0007423)	6.392e-05
85	negative regulation of cell communication (GO:0010648)	6.558e-05
86	transmembrane receptor protein tyrosine kinase signaling pathway (GO:0007169)	7.759e-05
87	pancreas development (GO:0031016)	8.032e-05
88	cardiac left ventricle morphogenesis (GO:0003214)	8.032e-05
89	regulation of anatomical structure morphogenesis (GO:0022603)	9.383e-05
90	vocal learning (GO:0042297)	0.0001022
91	type B pancreatic cell development (GO:0003323)	0.0001022
92	imitative learning (GO:0098596)	0.0001022
93	negative regulation of signaling (GO:0023057)	0.0001023
94	regulation of canonical Wnt signaling pathway (GO:0060828)	0.0001027
95	regulation of branching involved in ureteric bud morphogenesis (GO:0090189)	0.000108
96	positive regulation of mesonephros development (GO:0061213)	0.000108
97	sprouting angiogenesis (GO:0002040)	0.0001108
98	negative regulation of response to DNA damage stimulus (GO:2001021)	0.0001125
99	negative regulation of neuron differentiation (GO:0045665)	0.0001249
100	striated muscle tissue development (GO:0014706)	0.0001341

## Sheet: WT & KO E7.5_Up_207 genes
Feature ID	Experiment - Range (normalized values)	Experiment - IQR (normalized values)	Experiment - Difference (normalized values)	Experiment - Fold Change (normalized values)	EDGE test: WT 7.5 vs KO 7.5, tagwise dispersions - P-value	EDGE test: WT 7.5 vs KO 7.5, tagwise dispersions - Fold change	EDGE test: WT 7.5 vs KO 7.5, tagwise dispersions - Weighted difference	EDGE test: WT 7.5 vs KO 7.5, tagwise dispersions - FDR p-value correction
0610005C13Rik	27.3333	5.5	17.6111	2.44749	0.000109374	2.319	8.40166e-06	0.00736861
1500009L16Rik	53.5	23	35.8333	2.16007	3.04395e-07	2.14856	1.75241e-05	4.73149e-05
3830417A13Rik	35.1667	27.6667	27.9444	3.44175	3.51413e-10	3.27856	1.34667e-05	1.2358e-07
9230114K14Rik	13	8	10.6667	2.71429	0.00047619	2.52515	5.04913e-06	0.0243171
Abca3	157.5	59.6667	89.2778	2.07852	5.85508e-07	2.09942	4.36466e-05	8.22449e-05
Abcb1b	42.6667	11	26.9444	2.13318	8.47829e-06	2.14395	1.3269e-05	0.000856204
Abhd11	30	15.1667	17.9444	2.00311	0.000136405	2.01171	8.93658e-06	0.00877255
Abhd4	44.3333	40.8333	41.4444	2.4685	2.25344e-11	2.47087	2.03661e-05	1.12866e-08
Acot1	40.8333	22.3333	26.8889	2.23155	4.85802e-07	2.28694	1.34996e-05	7.04341e-05
Als2cl	40.8333	9.5	20.8333	2.17188	6.74485e-05	2.09999	1.00003e-05	0.00496944
Ano3	8.33333	1.66667	4.61111	42.5	0.00070837	11.0224	2.22931e-06	0.0331676
Apaf1	91.1667	53.8333	67.3333	2.00414	3.6806e-10	2.04701	3.34674e-05	1.26917e-07
Apobr	9.33333	5.66667	7.16667	4.07143	0.000973398	3.44496	3.32748e-06	0.0421905
Arap2	91.1667	35.1667	58.8333	2.1254	2.58106e-08	2.1407	2.88813e-05	5.35489e-06
Arhgap22	18.3333	10.5	12.3333	3.01818	5.25884e-05	2.90743	6.00772e-06	0.00401168
Arhgap9	11.8333	6.16667	9.05556	4.13462	0.000150343	3.54251	4.28276e-06	0.00952075
Arl8a	37.6667	20.3333	25.0556	2.08153	4.61643e-06	2.16464	1.28094e-05	0.000505311
Bbc3	14.8333	7.33333	10.5	3.52	0.000177262	3.10477	4.91119e-06	0.0109869
BC021767	9.66667	6.33333	6.5	6.08696	0.000254114	5.47446	3.17981e-06	0.0147717
BC029214	8.66667	4.66667	5.83333	10.5455	0.000621142	5.94291	2.70452e-06	0.0297562
Bhlhe40	26	9.16667	14.7778	2.51136	8.50077e-05	2.54247	7.38127e-06	0.00599588
Bmp8b	61.5	26.5	35.9444	2.25631	3.56683e-07	2.2207	1.73597e-05	5.4086e-05
Btg2	57.3333	48	51.5556	3.08539	1.74992e-16	3.07243	2.53405e-05	2.06595e-13
C77370	65	47.5	49.4444	2.01251	5.84338e-09	1.98602	2.37323e-05	1.52497e-06
Card19	18	7.66667	12.1667	2.752	0.000158038	2.60435	5.83463e-06	0.00994456
Ccng1	654.667	585.667	613.944	5.25529	3.58196e-99	5.10837	0.000287745	1.77611e-94
Cd40	16.1667	6.5	10.3333	4.1	8.1069e-05	3.65933	4.91598e-06	0.00578389
Cdkn1a	39	14.6667	23.6667	3.80263	2.1199e-08	3.73312	1.17165e-05	4.53083e-06
Cebpa	12	2.5	8.33333	5.16667	0.000219844	4.1889	3.81685e-06	0.0131337
Cebpb	14	6.83333	8.83333	3.48438	0.00047724	3.3076	4.27402e-06	0.024326
Ces2b	19	7.83333	12.7778	2.75573	0.000100709	2.62158	6.15977e-06	0.00684998
Cfi	33.1667	11.6667	23.2778	2.76793	2.91915e-07	2.73521	1.13903e-05	4.55175e-05
Chst15	22.6667	5.16667	12.5	2.48026	0.000349061	2.4314	6.13487e-06	0.0189783
Cldn3	39.3333	12.6667	21.5	3.09189	1.47192e-06	2.97826	1.03456e-05	0.000186186
Cox6b2	25.5	18.6667	20.5	3.71324	1.30887e-08	3.6666	1.01379e-05	2.97707e-06
Cpne2	53.8333	9.33333	26.6667	3.98137	5.52487e-06	3.65921	1.27887e-05	0.000594253
Cpt1c	46.8333	20.6667	32.0556	4.87248	1.20158e-12	4.5083	1.55347e-05	7.44756e-10
Cyp26a1	216.833	74.3333	144.944	2.01085	8.39617e-09	1.98402	6.85565e-05	2.07127e-06
Dapk2	17.1667	5.83333	9.94444	3.48611	0.00021889	2.97357	4.59458e-06	0.0130925
Dcxr	22.1667	9.5	16.1111	4.71795	1.10283e-07	4.33876	7.78782e-06	1.97415e-05
Ddit4l	23.1667	11.8333	14.4444	4.66197	3.6958e-07	4.21983	6.9796e-06	5.57009e-05
Dennd2c	22.5	12.6667	14.8333	2.09426	0.000525841	1.95304	6.81003e-06	0.0262217
Dgka	88.1667	33.1667	54.1111	2.20545	3.42486e-08	2.23168	2.65371e-05	6.79288e-06
Dnmt3l	98	55.3333	65.0556	2.01561	2.99985e-08	2.00541	3.13015e-05	6.04665e-06
Dok2	13.6667	7.33333	10.0556	3.91935	0.000128833	3.29139	4.59838e-06	0.00838718
Dppa4	75.5	27	52.7222	3.27578	5.51919e-10	3.23569	2.56008e-05	1.84912e-07
Dscaml1	5.66667	2.16667	3.55556	#N/A	0.00111267	30.0625	1.75433e-06	0.0464407
Duox2	38.3333	20.3333	26.3333	2.16176	9.78202e-07	2.1352	1.27565e-05	0.000128318
Dusp14	15.8333	8.33333	10.5556	3.2619	0.000316726	2.85096	4.90938e-06	0.0175473
Eda2r	58.6667	40.5	44.7222	8.38532	1.27997e-21	7.91078	2.17699e-05	4.53337e-18
Efna3	59.1667	27.3333	34.5556	2.1127	2.28616e-06	2.07833	1.66273e-05	0.000277162
Egr1	18.8333	10.6667	12.3333	3.84615	3.95756e-05	3.29163	5.70326e-06	0.00317534
Elf3	49	8.66667	30.5	2.00734	2.84459e-05	2.05685	1.54002e-05	0.00241936
Elf5	225.5	107.833	140.778	2.47411	2.22447e-10	2.43453	6.6882e-05	8.35608e-08
Enpp5	27	10.5	16.3333	2.10943	7.87005e-05	2.17737	8.31477e-06	0.00564742
Eomes	389.5	268.333	291.833	2.73481	3.34814e-07	2.65526	0.00013644	5.13987e-05
Eps8l2	90.5	41.5	65.8889	2.10326	2.10248e-09	2.15272	3.26488e-05	6.06113e-07
Esrp2	54	25.6667	41.8889	2.05307	2.00746e-08	2.07559	2.06495e-05	4.32782e-06
Esrrb	203	139	151.111	3.61036	1.94403e-14	3.54901	7.20917e-05	1.81877e-11
F2rl1	109.5	42.8333	59.3889	2.14823	4.76028e-06	2.13255	2.84838e-05	0.000518766
F3	23	9.5	14.6667	3.35714	8.22881e-06	3.15415	7.12897e-06	0.000836118
Fabp1	30.6667	15	21.5	2.42279	2.93872e-06	2.36059	1.04171e-05	0.000344483
Fabp3	338.667	138.167	241.667	2.28813	5.88388e-13	2.24391	0.000112949	3.89003e-10
Fam124a	33.1667	14.5	20.8889	4.008	2.77273e-08	3.51692	9.86842e-06	5.68124e-06
Fam189a2	12.6667	6.83333	9.5	2.67647	0.000943797	2.53311	4.57482e-06	0.0411537
Fam212b	19.1667	18.1667	17.8333	3.74359	1.32839e-07	3.63291	8.71781e-06	2.26352e-05
Fam83h	37.6667	14.8333	24.2778	2.1779	3.49864e-06	2.21301	1.20945e-05	0.000400646
Fermt1	39.1667	25.1667	30.1667	2.64545	9.64695e-09	2.55646	1.44264e-05	2.33949e-06
Fgf5	96	52.3333	70.1111	3.74946	1.70552e-07	3.64523	3.3822e-05	2.82837e-05
Fgf8	42.6667	10.6667	22.9444	2.24773	3.13697e-05	2.28475	1.13544e-05	0.00264535
Fgfbp1	74.8333	33	52.1667	5.08261	6.2472e-16	5.0899	2.55284e-05	6.45349e-13
Fos	15.1667	8	10.3889	2.73148	0.000578401	2.6901	5.05247e-06	0.028284
Foxd3	9.66667	2.16667	6.44444	17.5714	0.000120551	8.87024	3.02213e-06	0.00798066
Foxq1	9.66667	5.5	7.22222	11	6.81611e-05	7.1115	3.34268e-06	0.00499966
Fthl17a	10	4.83333	6.88889	6.90476	0.000242471	5.47904	3.18127e-06	0.0142621
Gatsl3	19.8333	11	11.9444	2.44295	0.000330725	2.50833	5.98747e-06	0.0182211
Gc	33.3333	13.3333	21.9444	4.26446	1.28808e-08	4.2115	1.06592e-05	2.95692e-06
Gjb3	152.167	67	99.7778	2.20375	5.93839e-10	2.21002	4.83902e-05	1.96303e-07
Gjb5	40	28.1667	32.8889	3.52991	2.52944e-12	3.59019	1.61673e-05	1.47556e-09
Gm1673	16.8333	12	12.0556	2.4863	0.000445919	2.24903	5.53022e-06	0.0231044
Gm20544	14	3.5	8	6.53846	0.00016658	5.35642	3.80308e-06	0.010416
Gm21685	5.83333	1	3.83333	#N/A	0.00114445	30.0725	1.75492e-06	0.0476069
Gm9	31.8333	18.6667	22.7222	2.32362	1.38691e-06	2.30198	1.10537e-05	0.000177242
Gpx3	431.833	162.333	317.333	2.12685	1.34405e-10	2.05998	0.000145115	5.41826e-08
Gramd2	14.5	4.66667	9.33333	4.57447	0.000120922	3.82424	4.28939e-06	0.00799454
Grhl3	21	15.1667	18	2.55769	3.13755e-06	2.53911	8.84052e-06	0.000364711
Gsc	15.8333	6.83333	10.6667	11.1053	8.84219e-07	8.18637	5.0898e-06	0.00011825
Gtpbp2	19.8333	14.3333	15.8333	2.06343	8.70955e-05	2.08915	7.85127e-06	0.00609115
Habp2	87.1667	31.8333	54.2222	2.64865	9.32974e-10	2.74077	2.70267e-05	2.94659e-07
Hint3	16.3333	8	11.7778	2.72358	0.000276191	2.52421	5.53062e-06	0.0157594
Hkdc1	78	15.1667	40.3333	2.3176	1.49255e-05	2.33434	1.98708e-05	0.00139638
Hspb1	47.1667	20.5	31	3.24096	4.88823e-09	3.13109	1.49529e-05	1.3173e-06
Igfbp1	71.5	9.33333	37.6667	9.16867	1.27498e-06	8.68325	1.84017e-05	0.000164635
Inpp1	43	24.1667	28.2778	2.03245	3.57052e-06	2.00195	1.36198e-05	0.000406065
Irak2	17.1667	3	9.94444	3.48611	0.000394649	3.12217	4.60396e-06	0.0209291
Irx2	60	16.5	36.1667	2.07249	2.46831e-06	2.11091	1.80559e-05	0.000297066
Itga7	24.6667	12.5	18	2.03185	7.90426e-05	2.01897	8.80129e-06	0.0056556
Junb	38.8333	20.8333	25.7222	2.18718	8.88995e-07	2.25004	1.28848e-05	0.000118497
Klf4	28.3333	6.33333	16.1111	2.34884	0.000339883	2.40577	8.1225e-06	0.0185799
Klhl13	443.667	253	344.444	2.48717	3.49998e-21	2.42376	0.000160787	1.08467e-17
Klhl22	198.333	112.5	153.278	2.04746	1.50375e-11	2.00337	7.1605e-05	7.68696e-09
Krt23	10.6667	3	5.5	17.5	0.000228897	12.4671	2.55575e-06	0.0135764
Ldlrap1	72	48.3333	60.5556	2.37107	1.03041e-13	2.40028	2.98048e-05	7.86047e-11
Ldoc1	23.3333	14.5	18.6667	3.43478	1.30315e-07	3.28333	9.02731e-06	2.24363e-05
Lif	12.6667	3.66667	7.44444	4.19048	0.00110061	3.45594	3.33255e-06	0.0460925
Lipg	8.83333	2.83333	5.83333	9.75	0.000299938	8.02945	2.70568e-06	0.0168622
Mamld1	34.3333	3.5	15.1111	3.36522	0.000903613	3.31746	7.40635e-06	0.0397213
Mapkapk3	37.8333	25.5	29.8333	4.62838	4.91597e-13	4.37887	1.4447e-05	3.29403e-10
Mbnl3	37.8333	21.1667	26.7778	3.63388	8.97079e-10	3.45293	1.28555e-05	2.85139e-07
Mcam	23.5	12.3333	18.0556	6.15873	1.39156e-09	5.73782	8.73796e-06	4.25929e-07
Mettl26	16	9.33333	11.2778	2.16	0.000873736	2.15288	5.50259e-06	0.0388057
Mgmt	14.1667	9.33333	11.0556	3.11702	0.000245807	2.79771	5.06441e-06	0.0144082
Mgst3	25.6667	10.1667	15.3889	2.17872	0.000177978	2.13126	7.40074e-06	0.0110072
Mt1	204.833	103.5	159.111	2.47553	5.66925e-17	2.48167	7.65871e-05	8.26793e-14
Mt2	150	97.8333	125	3.48071	9.04146e-28	3.47166	6.0453e-05	1.04601e-23
Mybl1	32.8333	13.1667	17.6667	2.01923	0.000140571	2.07372	8.80267e-06	0.00900542
Mycl	51.1667	22	34.8333	2.09043	7.02053e-08	2.13927	1.74428e-05	1.31363e-05
Nat8l	66.1667	47.8333	49.7222	2.28592	6.07401e-09	2.26509	2.41143e-05	1.56052e-06
Ndrg1	72.1667	40.5	49.2778	2.23024	5.91902e-10	2.27909	2.45715e-05	1.96303e-07
Nfatc2	41.8333	23.3333	30.6111	2.3439	5.54424e-08	2.29247	1.47023e-05	1.04928e-05
Nfia	14.6667	7	9.27778	3.01205	0.00109935	2.55342	4.113e-06	0.0460925
Nfkbiz	52.1667	30.8333	40.3889	2.2913	3.47684e-10	2.33679	2.00236e-05	1.23142e-07
Nlrx1	17	9.16667	11.6667	2.43836	0.000294591	2.43382	5.67488e-06	0.0166181
Nr0b1	68.8333	26.1667	37.7222	2.52584	3.34425e-06	2.51226	1.83731e-05	0.000385639
Nr3c1	30.8333	15.6667	22.8889	2.63492	2.44375e-07	2.63276	1.1215e-05	3.88375e-05
Nr4a1	23.3333	8.66667	12.2222	2.30952	0.00103961	2.13469	5.55124e-06	0.0443244
Olr1	11.6667	3.66667	6	5.15385	0.000826403	5.01763	2.85935e-06	0.0371507
Perp	197	117	160.944	2.57531	8.01773e-19	2.54396	7.65184e-05	1.6565e-15
Pga5	12.5	4	8.05556	3.16418	0.000838115	3.05709	3.80027e-06	0.037575
Phlda3	42.8333	37.3333	36.3333	3.81897	9.36612e-14	3.84806	1.77636e-05	7.37173e-11
Pisd-ps1	13.3333	8.83333	10.1111	2.32847	0.00117709	2.28524	4.87979e-06	0.0487603
Plac1	64.6667	45.6667	54.3889	4.28523	7.88456e-21	4.42863	2.69614e-05	2.29974e-17
Plcd4	10.5	5.83333	7.33333	7.6	0.00014447	5.71002	3.33952e-06	0.00921952
Plet1	16.8333	12.5	12.4444	3.63529	2.24522e-05	3.15705	5.71172e-06	0.00199631
Plk2	91.1667	56	74.5556	4.31358	1.63885e-22	4.48469	3.66789e-05	7.3875e-19
Pmepa1	36	9.16667	21.4444	4.16393	2.24651e-07	4.16995	1.05027e-05	3.62844e-05
Podn	12	3.66667	6.44444	9.28571	0.000102709	8.85508	3.02988e-06	0.00696693
Polk	83.3333	35.6667	48.5556	2.18589	2.5898e-07	2.18943	2.36946e-05	4.07668e-05
Ppp2r2c	78.1667	69.5	71	3.45769	6.93263e-23	3.46293	3.44439e-05	4.29693e-19
Pqlc3	27.1667	10.8333	17.2222	2.21094	2.92451e-05	2.23808	8.50898e-06	0.00248308
Pramef12	42.3333	19.3333	29.4444	3.89617	4.14462e-11	3.93575	1.44817e-05	1.93675e-08
Pros1	72	64.8333	67.2222	2.29828	4.78987e-15	2.31256	3.26375e-05	4.65698e-12
Prrg4	26.6667	16.6667	20.3889	2.29225	3.41226e-06	2.27061	9.94936e-06	0.000392568
Prss12	87.1667	42.1667	56.9444	2.05236	1.85195e-08	2.09752	2.83137e-05	4.02758e-06
Psrc1	104.333	63	79.6667	2.2679	7.2539e-14	2.26438	3.84506e-05	5.89647e-11
Ptgr1	20	8.16667	11.7778	2.21839	0.000814217	2.18908	5.66853e-06	0.0367361
Rabac1	17.3333	8.33333	12.4444	2.42675	0.000216892	2.40283	6.00099e-06	0.0130043
Rasef	20.8333	1.83333	12.7778	2.71642	0.00049501	2.58953	6.0125e-06	0.0250205
Relt	15.1667	9.33333	10.8333	3.09677	0.000103498	3.09135	5.22233e-06	0.00701088
Rhox4a	20.8333	3.83333	11.7778	4.3125	5.61307e-05	4.01931	5.56735e-06	0.00422343
Rhox4b	14.1667	4.83333	10	#N/A	1.06509e-08	77.779	4.63468e-06	2.51488e-06
Rhox4e	12.1667	8.16667	9.22222	3.04938	0.000777082	2.83282	4.27159e-06	0.0356774
Rhox4g	28.1667	13.8333	17.6667	2.54369	8.29641e-06	2.46657	8.39005e-06	0.000841262
Rhox5	611.333	395.5	510.889	2.02371	5.42594e-24	1.95739	0.000234121	3.8435e-20
Rhox6	71	15.8333	43.6667	2.06216	1.67675e-05	2.08991	2.15781e-05	0.00153398
Rhox9	31.1667	13.5	21.4444	3.19318	5.89819e-08	3.2982	1.06198e-05	1.10781e-05
Rpl10-ps3	34.3333	21	24.8333	2.03233	3.13489e-06	2.03468	1.21233e-05	0.000364711
Rps12	188	51.8333	-44.7222	-1.26594	0.24831	-1.27911	-2.25697e-05	1
S100a6	20.3333	12.5	15.7222	2.32864	4.19895e-05	2.31783	7.5676e-06	0.00333654
S100g	272.167	19.1667	130.389	2.07562	0.000131684	2.08134	6.26352e-05	0.00852419
Sesn2	88.8333	47.8333	61.9444	2.30715	2.6219e-11	2.34997	3.04734e-05	1.27458e-08
Sgsm2	25.6667	13.5	20.3889	3.18452	8.50297e-08	3.13324	9.82031e-06	1.56155e-05
Slc19a2	59.5	44.5	50.6667	3.70623	5.47287e-17	3.64395	2.4494e-05	8.22793e-14
Slc30a2	28.8333	13.5	17.6667	3.32117	1.94336e-05	3.04633	8.20985e-06	0.00175842
Slc46a1	24.6667	10.8333	16.8889	2.78824	5.14004e-06	2.75287	8.07117e-06	0.0005577
Slc7a9	44	18	25.5	2.02227	1.50289e-05	2.05642	1.25778e-05	0.00139832
Smagp	26.1667	10.5	18	2.76087	1.69298e-06	2.7939	8.84287e-06	0.000210921
Sox21	70.6667	19.8333	36.2222	2.014	8.26113e-05	2.01475	1.76148e-05	0.00585405
Spp2	32.8333	8.66667	22	3.01015	8.31836e-07	3.13306	1.09329e-05	0.000112696
Srgn	26.8333	4.83333	16.1111	2.34884	0.000220858	2.39116	7.99852e-06	0.0131626
St14	201.833	105.833	152.222	2.59488	1.06837e-17	2.60888	7.33116e-05	1.82672e-14
St6galnac4	29.1667	9.33333	17.8889	2.05574	5.83347e-05	2.09911	8.81467e-06	0.00435622
Syne3	13.5	5.66667	8.77778	3.46875	0.00024597	3.44907	4.12382e-06	0.0144082
Synpo2l	18.1667	6.83333	11.6111	2.43151	0.000435946	2.30762	5.3725e-06	0.0226825
Tap1	11.6667	6.66667	9.22222	3.10127	0.000598598	2.9682	4.27105e-06	0.029128
Tapbp	27.8333	1	14.7778	2.03502	0.000652496	2.13666	7.51648e-06	0.0309904
Tbc1d2	18.8333	11	13.3333	2.21212	0.000352781	2.16486	6.30154e-06	0.0191373
Tcea3	55.1667	40.3333	44.8889	2.12067	3.60338e-10	2.1729	2.23415e-05	1.25827e-07
Tdgf1	351	229.5	261.667	4.82616	3.33245e-14	4.72322	0.000123704	2.95071e-11
Tfap2c	194.333	160.667	163.444	2.29832	5.47588e-17	2.28875	7.77003e-05	8.22793e-14
Tfec	24.5	15.5	18.5556	2.88701	3.29099e-07	2.98924	9.17265e-06	5.06781e-05
Tifa	7	3.33333	5.38889	14.8571	0.000340235	11.723	2.39064e-06	0.0185799
Tmem181b-ps	20.8333	10.8333	14.3889	2.78621	2.60161e-05	2.72073	6.80261e-06	0.00226179
Tmem254b	7.16667	0	4.05556	#N/A	0.000694476	32.6644	1.91138e-06	0.0326404
Tmem30b	23	11.1667	15.7222	2.05993	0.000127012	2.13807	7.84743e-06	0.00834157
Tmem38b	27.8333	17.5	21.0556	2.34397	1.84951e-06	2.3175	1.01089e-05	0.000228129
Tnfrsf10b	66	52	55.6667	3.51128	3.19486e-19	3.58538	2.74401e-05	6.88771e-16
Trap1a	147.833	55.6667	110.333	2.11385	3.18918e-09	2.12012	5.29969e-05	9.03632e-07
Trf	115.833	11.6667	51.6667	2.23342	0.000678877	2.31558	2.5862e-05	0.0320897
Triml1	21.8333	8.16667	12.4444	2.28736	0.000486497	2.25868	5.99287e-06	0.0247326
Triml2	100.833	52.5	75.6111	3.47905	1.84491e-18	3.59475	3.70003e-05	3.51846e-15
Trp53inp1	364	264	304.056	5.29255	1.53014e-41	5.20079	0.000143947	3.7936e-37
Tst	15.1667	6.33333	9.27778	3.25676	0.000315931	3.13302	4.27986e-06	0.0175328
Upp1	134	67.6667	93.3889	2.67932	9.94991e-14	2.69343	4.5087e-05	7.70885e-11
Utf1	97.1667	45.6667	65.1667	2.73009	1.22807e-09	2.72711	3.14384e-05	3.78222e-07
Vgll1	34.5	18.3333	25.9444	5.62376	1.54171e-12	6.08135	1.27294e-05	9.21032e-10
Wipf3	22.8333	5.33333	12.7778	2.15	0.000606835	2.19312	6.27701e-06	0.0292989
Wnt3	33.3333	29.8333	27.6667	3.27397	6.60483e-10	3.13009	1.31796e-05	2.15461e-07
Wnt6	36	16	20.5	2.23411	8.89783e-05	2.18414	9.72773e-06	0.00619662
Xlr4b	23.8333	12.3333	16.8333	2.42254	1.33204e-05	2.42952	8.20058e-06	0.00126774
Xlr5a	38.6667	19	28.1111	2.73288	9.67217e-09	2.756	1.3759e-05	2.33949e-06
Xlr5c	10	4.83333	6.83333	25.6	2.88094e-06	53.8305	3.18905e-06	0.000339315
Zak	109	51.5	73.7222	2.00913	5.28829e-10	2.06079	3.65856e-05	1.78381e-07
Zfp365	32	10.1667	18	3.4	3.56388e-06	3.39792	8.68508e-06	0.000406065
Zfp36l3	12.5	4.83333	7.55556	6.44	4.35213e-05	7.40018	3.50544e-06	0.00343085
Zfp382	50	27.8333	38.5	3.06866	1.39051e-12	3.1369	1.88602e-05	8.40837e-10
Zfp42	94.3333	41.6667	60.6111	2.5927	1.42114e-11	2.65553	2.96595e-05	7.34035e-09
Zfp936	32.6667	13.8333	20	2.57205	9.97936e-06	2.52481	9.66288e-06	0.000979855

## Sheet: KEGG 2019_Up in KO E7.5
Index	Name	P-value
1	Mineral absorption	8.85e-05
2	p53 signaling pathway	9.355e-05
3	Breast cancer	0.0008626
4	Gastric cancer	0.000971
5	Basal cell carcinoma	0.004123
6	Melanoma	0.006626
7	Pathways in cancer	0.01007
8	PPAR signaling pathway	0.01176
9	Transcriptional misregulation in cancer	0.01212
10	Colorectal cancer	0.01322
11	ABC transporters	0.01343
12	Signaling pathways regulating pluripotency of stem cells	0.01408
13	VEGF signaling pathway	0.02223
14	Hippo signaling pathway	0.02502
15	Vitamin digestion and absorption	0.02534
16	TNF signaling pathway	0.02752
17	Epstein-Barr virus infection	0.03224
18	Hepatocellular carcinoma	0.0328
19	MAPK signaling pathway	0.03378

## Sheet: GO term 2018_Up in KO E7.5
Index	Name	P-value
1	vesicle fusion with endoplasmic reticulum-Golgi intermediate compartment (ERGIC) membrane (GO:1990668)	0.001556
2	phospholipid homeostasis (GO:0055091)	0.002865
3	gonad development (GO:0008406)	1.103e-05
4	gastrulation (GO:0007369)	0.0006676
5	vitamin transmembrane transport (GO:0035461)	0.003658
6	male gonad development (GO:0008584)	7.911e-05
7	development of primary male sexual characteristics (GO:0046546)	7.911e-05
8	male meiosis I (GO:0007141)	0.004542
9	vitamin transport (GO:0051180)	0.001661
10	intrinsic apoptotic signaling pathway in response to endoplasmic reticulum stress (GO:0070059)	0.001884
11	negative regulation of chemokine production (GO:0032682)	0.007714
12	modified amino acid transport (GO:0072337)	0.008938
13	cell migration involved in sprouting angiogenesis (GO:0002042)	0.008938
14	amide transport (GO:0042886)	0.01024
15	DNA alkylation (GO:0006305)	0.01163
16	DNA methylation or demethylation (GO:0044728)	0.01163
17	lipid homeostasis (GO:0055088)	0.001641
18	response to purine-containing compound (GO:0014074)	0.01309
19	cellular response to fibroblast growth factor stimulus (GO:0044344)	0.0004368
20	blood vessel endothelial cell migration (GO:0043534)	0.01463
21	DNA methylation (GO:0006306)	0.01463
22	anion homeostasis (GO:0055081)	0.01463
23	response to organophosphorus (GO:0046683)	0.01463
