# Supplementary material for: Disruption of entire Cables2 locus leads to embryonic lethality by diminished Rps21 gene expression and enhanced p53 pathway
Source: eLife. 2021 May 5;10:e50346. doi: 10.7554/eLife.50346 (PMC8099427; doi:10.7554/eLife.50346)
Supplement: Supplementary file 4. [file elife-50346-supp4.xlsx]

## Sheet: Sheet1
Supplementary File 4. CRISPR target sites for gene-modified mice generation (PAM sequence)
Target	Sequences
Rps21 KO CRISPR L	AACTCTGCAGGGACGGCCTCAGG
Rps21 KO CRISPR R	CCTGTGACAGTTAAGTCTGCTTT
Rps21 indel CRISPR	CCGAGGTGAGCTGGGAACCTGAC
Cables2 Exon1 CRISPR L	GTCCTGGACATCCTCCACGAAGG
Cables2 Exon1 CRISPR R	TGGAAGAGCTAGGACGGCGTGGG
