# Supplementary material for: Disruption of entire Cables2 locus leads to embryonic lethality by diminished Rps21 gene expression and enhanced p53 pathway
Source: eLife. 2021 May 5;10:e50346. doi: 10.7554/eLife.50346 (PMC8099427; doi:10.7554/eLife.50346)
Supplement: Supplementary file 5. [file elife-50346-supp5.xlsx]

## Sheet: Sheet1
Supplementary File 5. Primers for genotyping, RT-PCR and RT-qPCR
Primer	Experiment	Sequences
Cables2 D3-1	Genotyping	ACTGCAGAAGCTGGAGGAAA
Cables2 D3-2	Genotyping	TCAAGGTGTCTGCCCTATCC
Cables2 D3-3	Genotyping	AGGGGATCCGCTGTAAGTCT
TOPGAL-TK	Genotyping	CGAGGTCCACTTCGCATATT
LacZ R	Genotyping	TATTGGCTTCATCCACCACA
Rps21 primer F	Genotyping	CGGTATGGTGGATACGAGTACCCTGAC
Rps21 primer R	Genotyping	AGCACTGTTAAAGCCAACCCTTAAACCA
Cables2 Exon1 left F	Genotyping	GAGGCAGGCAGATTTCTGAG
Cables2 Exon1 left R	Genotyping	ACGGAACCTGTGTCCTGTTC
Cables2 Exon1 right F	Genotyping	TGGCTACCACCTCAGCCTAC
Cables2 Exon1 right R	Genotyping	AGAGCTACCGGATGGAGGAT
Cables2 RT-PCR F	RT-PCR	CACCAGCTGGCACAGAACTA
Cables2 RT-PCR R	RT-PCR	GCTTGAGGATCAAGTGTGGTTCAAAGTC
Gapdh RT-PCR F	RT-PCR	ACCACAGTCGATGCCATCAC
Gapdh RT-PCR R	RT-PCR	TCCACCACCCTGTTGCTGTA
Cables2 exon3 qPCR Fw	qPCR	AGCATGCATCTGGATCACCA
Cables2 exon4 qPCR Rv	qPCR	CCGCTTGGCACAGATGAGTA
Cables2 exon4 qPCR Fw	qPCR	GGCCTACGGATCAGTGACCT
Cables2 exon5-6 qPCR Rv	qPCR	CGACCTTTCCATCTGCTCCC
Cables2 exon8 qPCR Fw	qPCR	GAAACCTGCAGACCTCAAGA
Cables2 exon9 qPCR Rv	qPCR	TCAGAAAGGTTCCGCATCTC
Gapdh qPCR Fw	qPCR	TGTGTCCGTCTGGATCTGA
Gapdh qPCR Rv	qPCR	TTGCTGTTGAAGTCGCAGGAG
Cdkn1a (p21) qPCR Fw	qPCR	AACATCTCAGGGCCGAAA
Cdkn1a (p21) qPCR Rv	qPCR	TGCGCTTGGAGTGATAGAAA
Rps21 qPCR Fw	qPCR	GGACAAGTGAGCAGGGACGG
Rps21 qPCR Rv	qPCR	AACCGGCCTGTGGTCCTATC
p53 qPCR Fw	qPCR	TCCTTTGCCCTGAACTGCCC
p53 qPCR Rv	qPCR	CCCGGAACATCTCGAAGCGT
Trp53inp1 qPCR Fw	qPCR	CTGCCACAAGAAAGGGAGAG
Trp53inp1 qPCR Rv	qPCR	ACAGATGCCACCAGAAATCC
Ccng1 qPCR Fw	qPCR	TCAGTTCTTTGGCTTTGACACG
Ccng1 qPCR Rv	qPCR	GATGCTTCGCCTGTACCTTCATT
