# Supplementary material for: Disruption of entire Cables2 locus leads to embryonic lethality by diminished Rps21 gene expression and enhanced p53 pathway
Source: eLife. 2021 May 5;10:e50346. doi: 10.7554/eLife.50346 (PMC8099427; doi:10.7554/eLife.50346)
Supplement: Supplementary file 6. [file elife-50346-supp6.xlsx]

## Sheet: Sheet1
Supplementary File 6. Mendelian ratio of Cables2d and Cables2e1 intercross at E9.5
Number of pair	Total number of embryos	Genotypes
		+/+	d/e	+/d	+/e1
3	18	5 (27.8)a	4 (22.2)	5 (27.8)	4 (22.2)
aNumber of embryos (percentage)
